# Supplementary material for: An update of pathogenic variants in ASPM, WDR62, CDK5RAP2, STIL, CENPJ, and CEP135 underlying autosomal recessive primary microcephaly in 32 consanguineous families from Pakistan
Source: PubMed Central journal article supplement (PMC7507472; doi:10.1002/mgg3.1408), 2020-07-17
Supplement: MGG3-8-e1408-s001.pdf [file MGG3-8-e1408-s001.pdf]

**FIGURE S1**

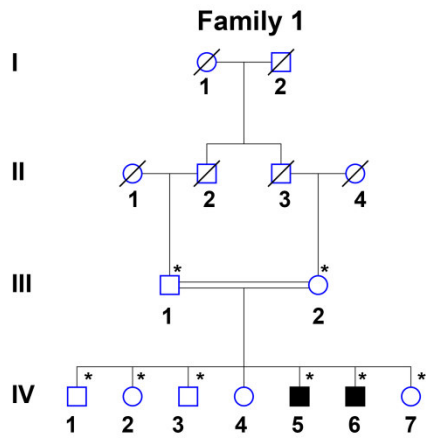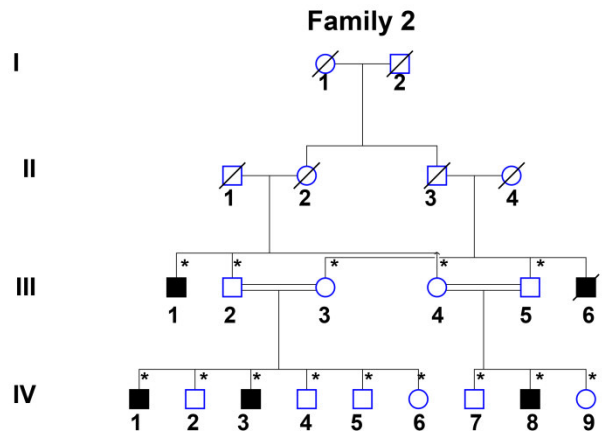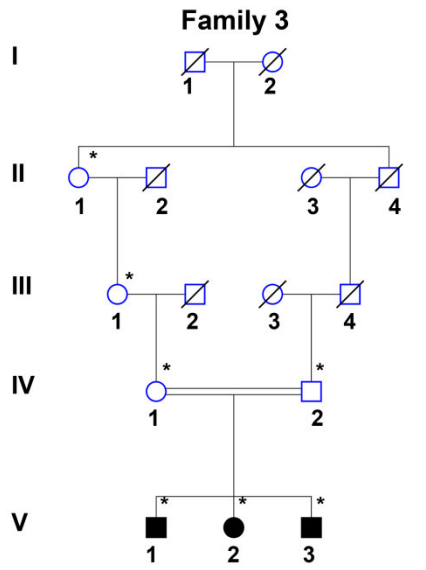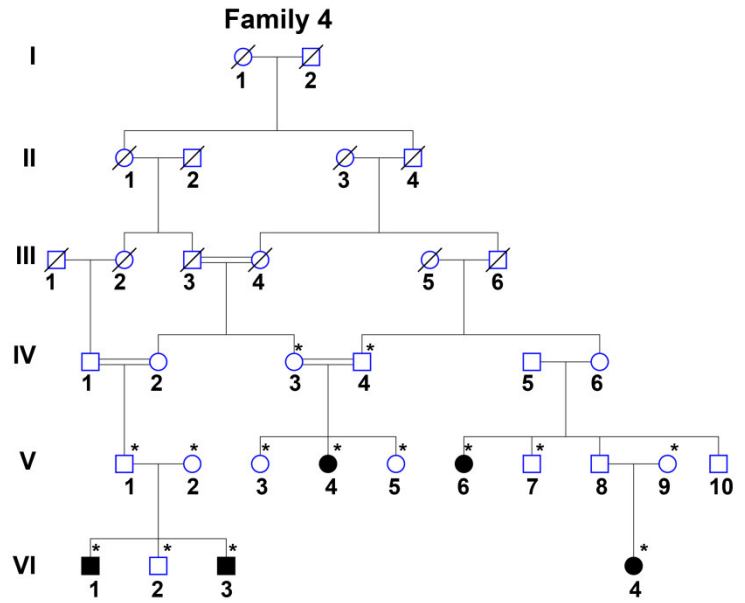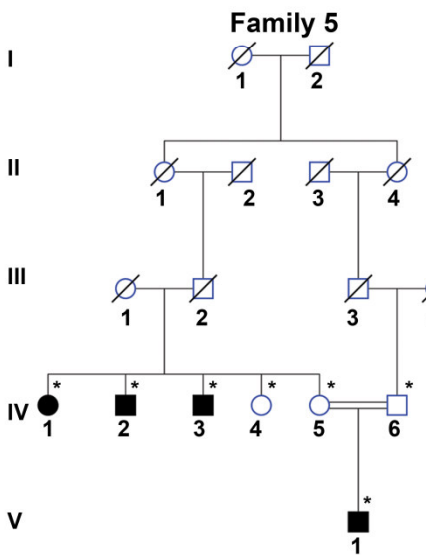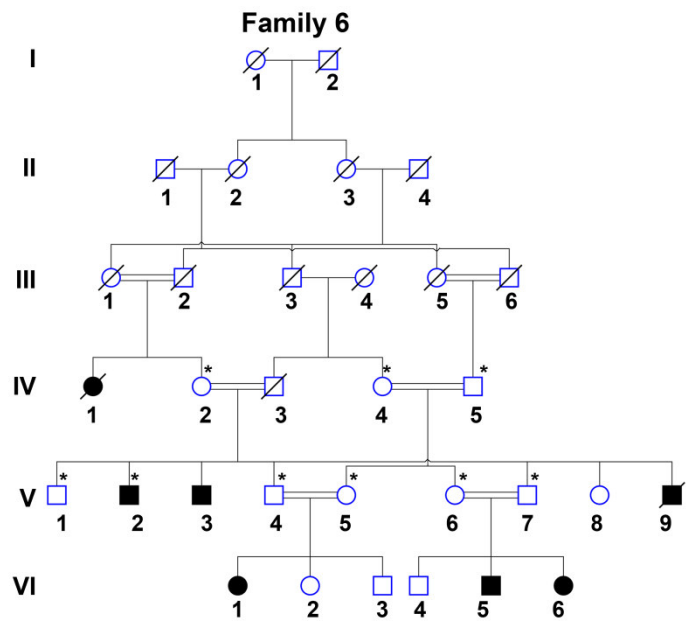

FIGURE S1

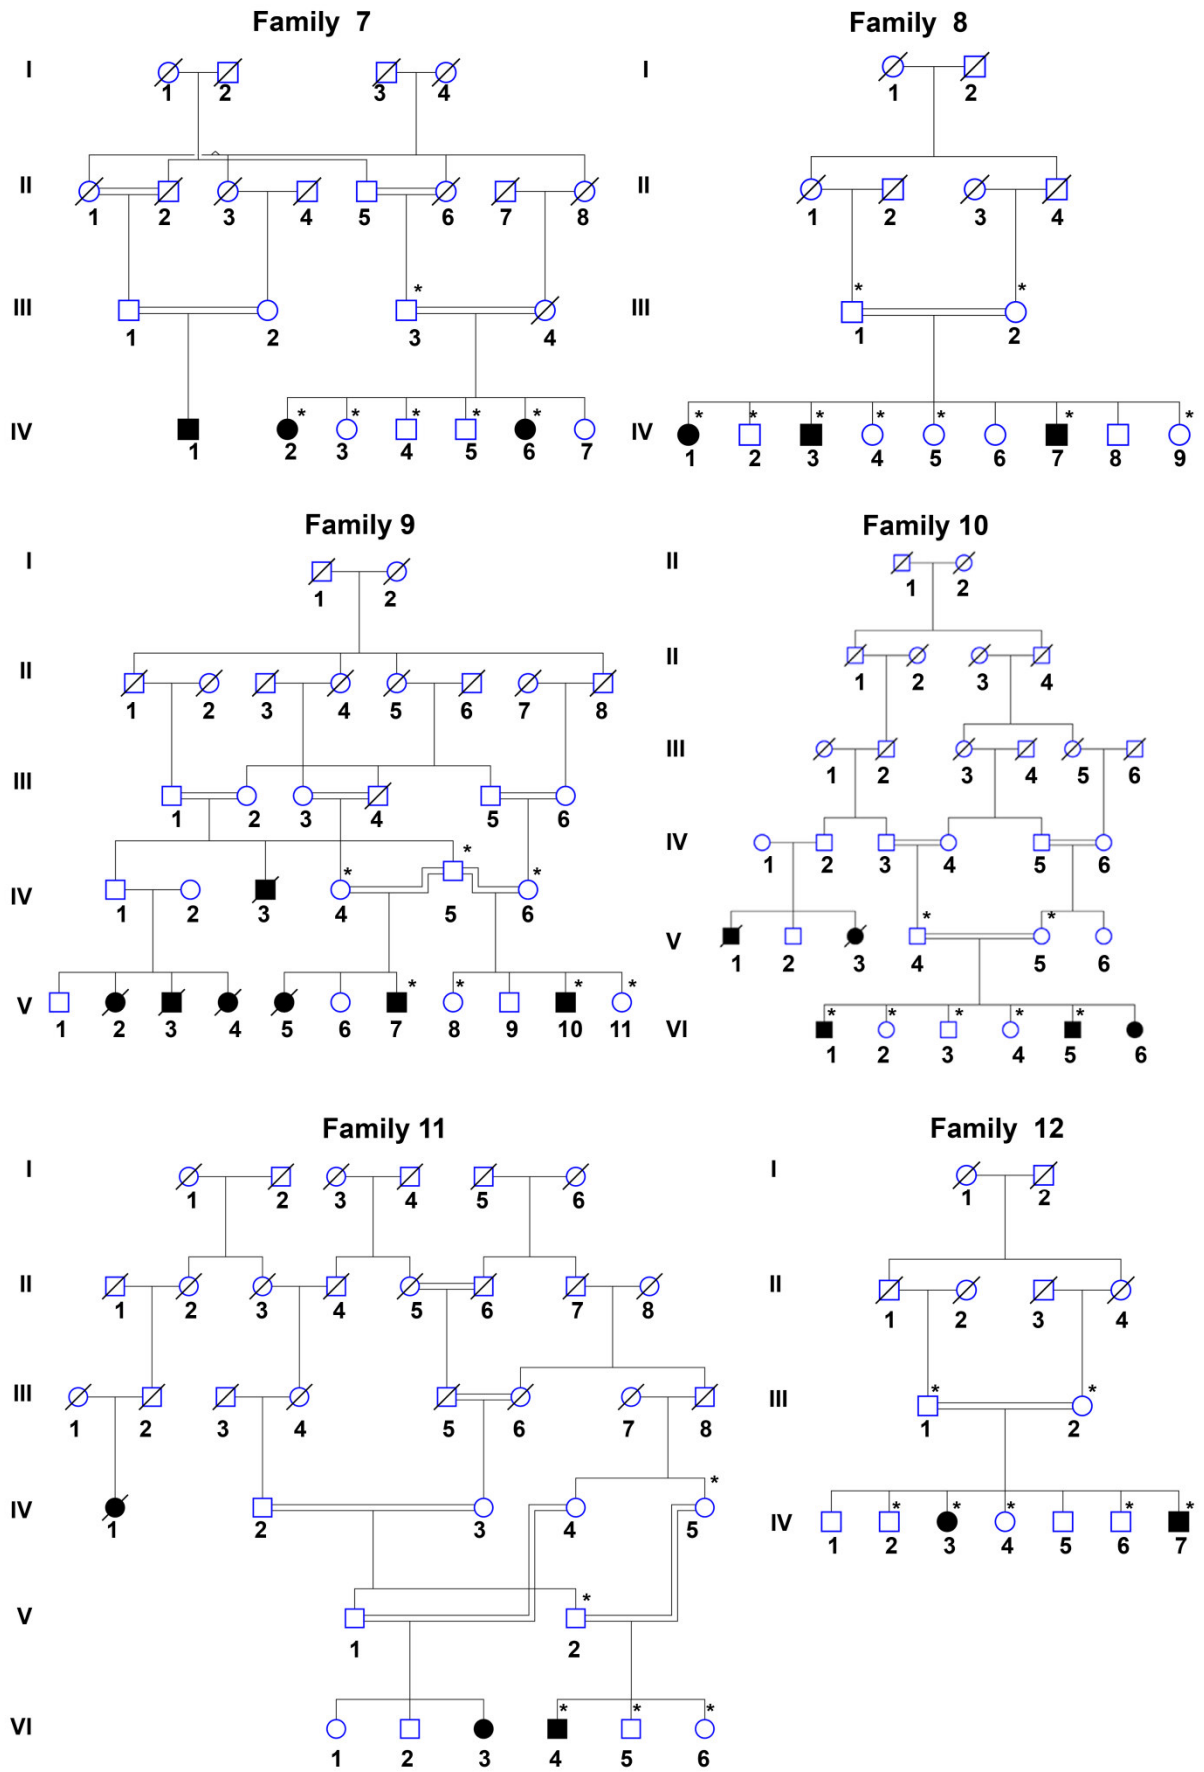

FIGURE S1

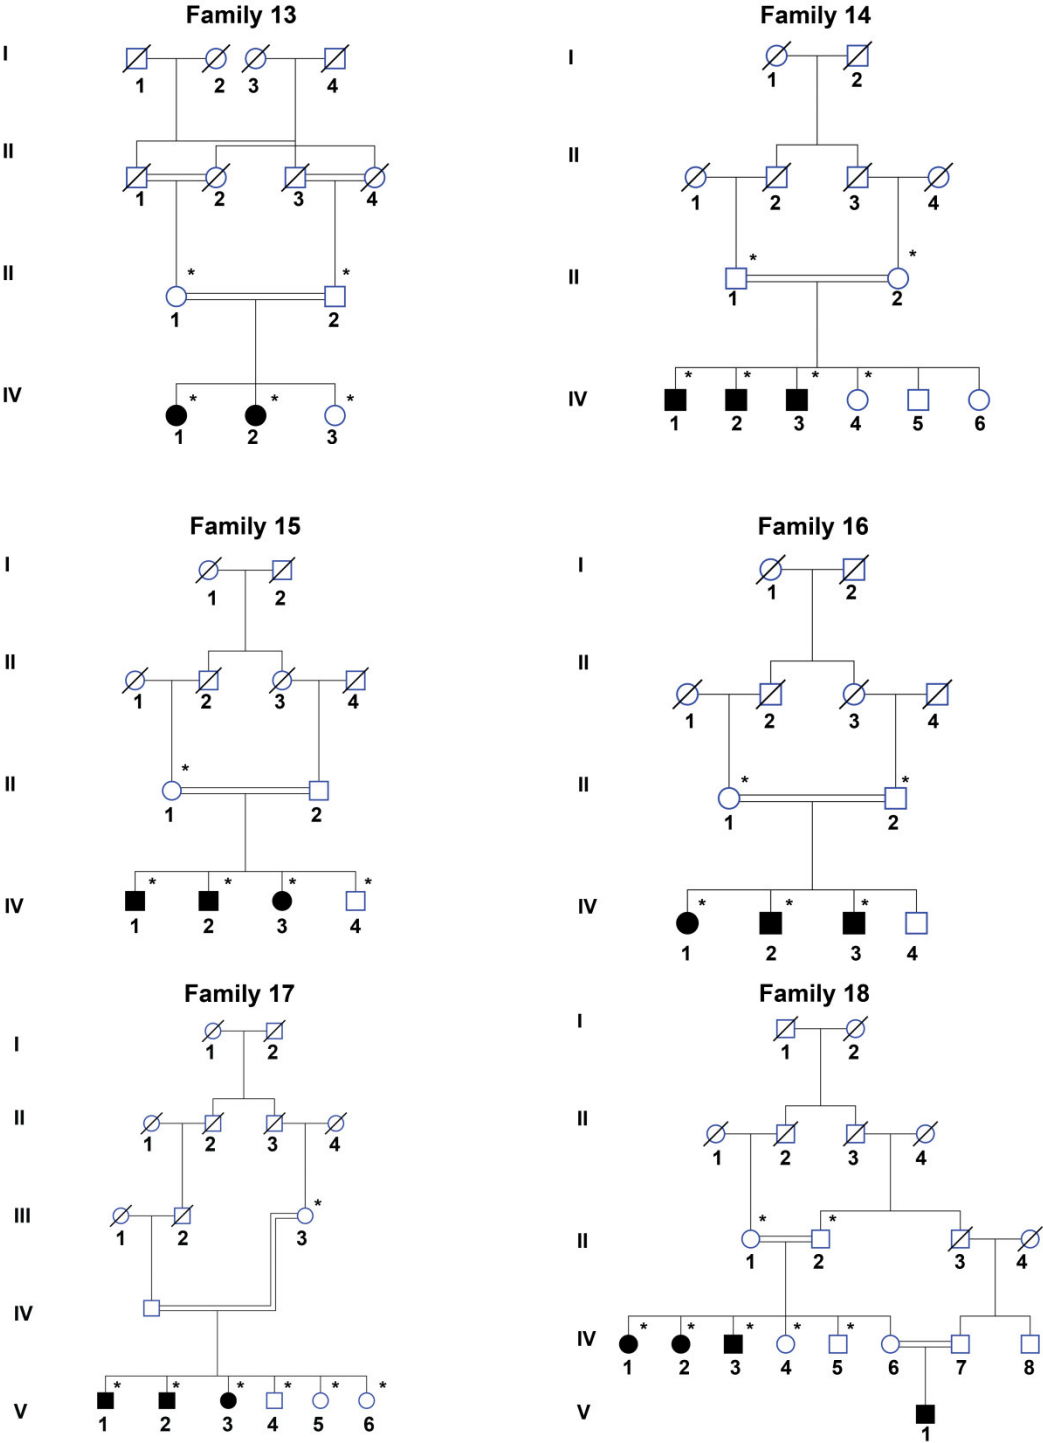

FIGURE S1

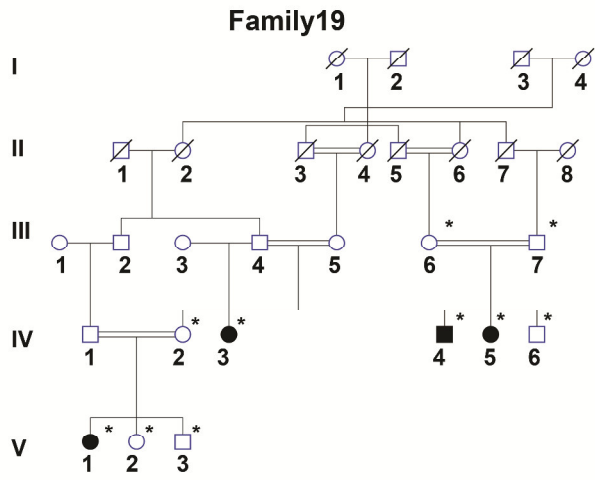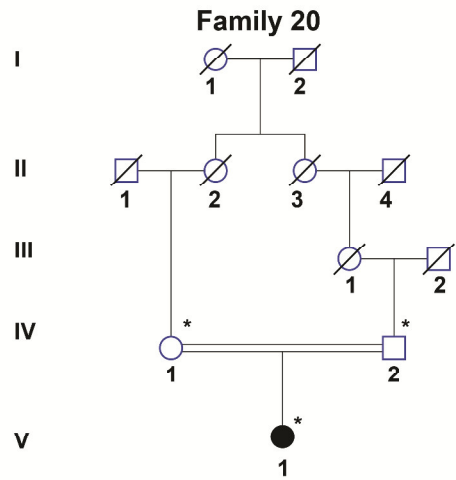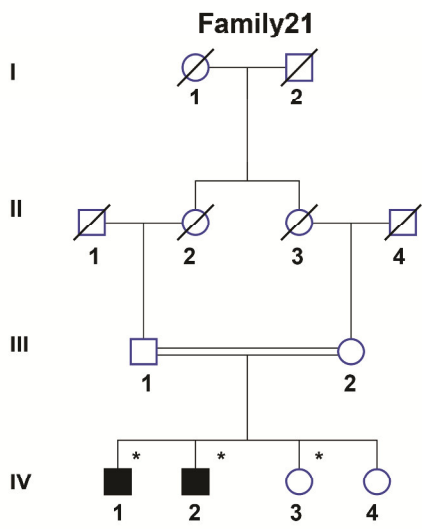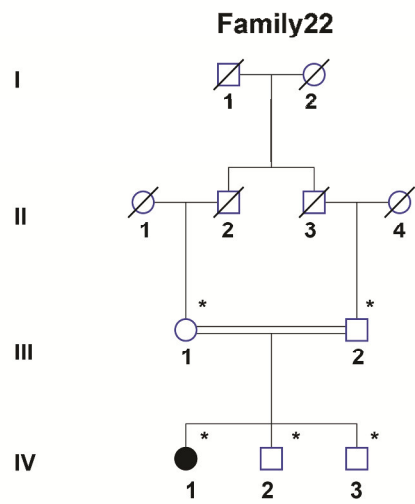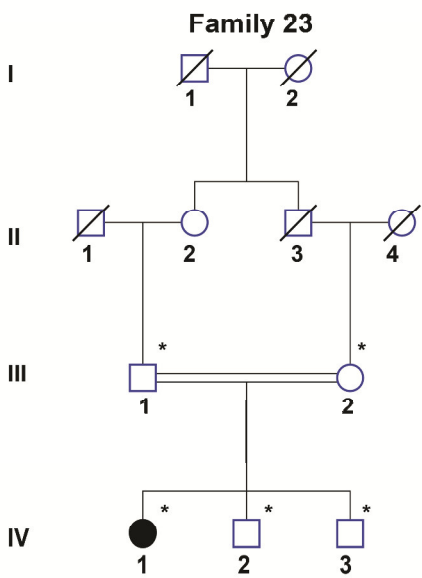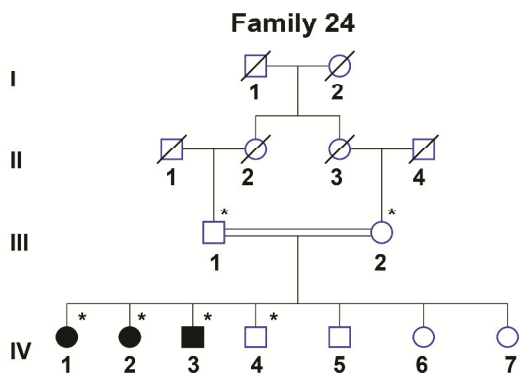

FIGURE S1

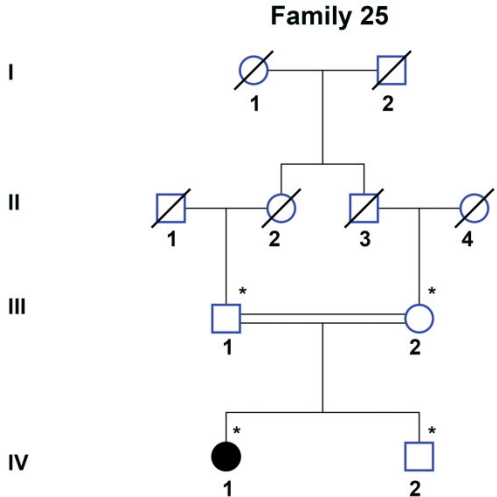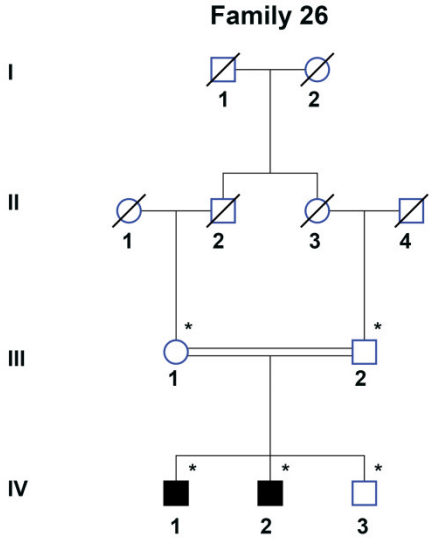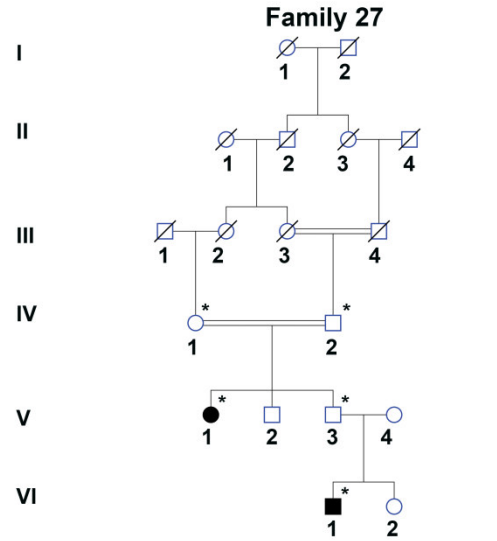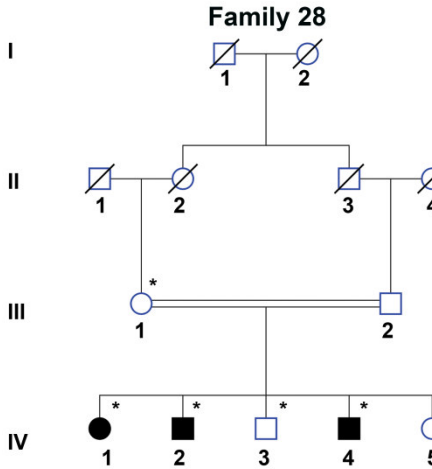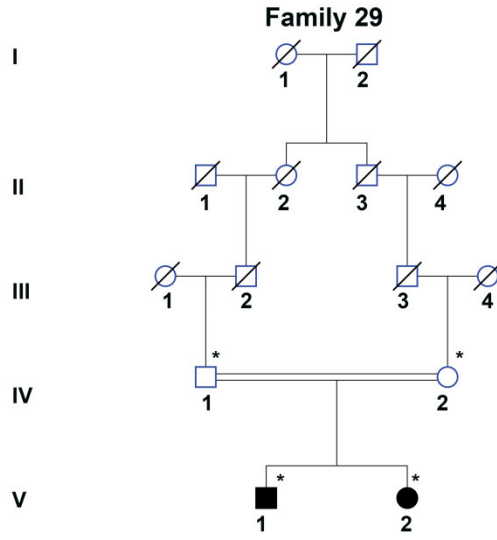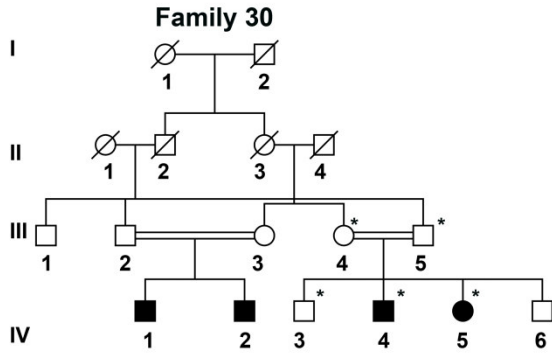

**FIGURE S1**

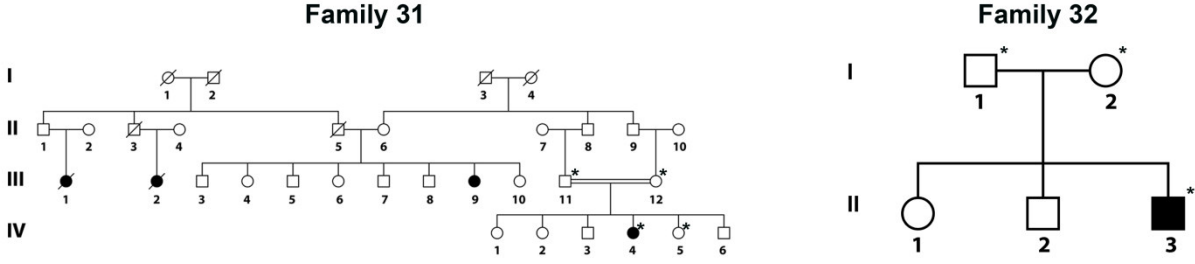

**FIGURE S1** Pedigrees of 32 MCPH families subjected for genomic analyses. Asterisks (\*) denote individuals participated in this study

FIGURE S2

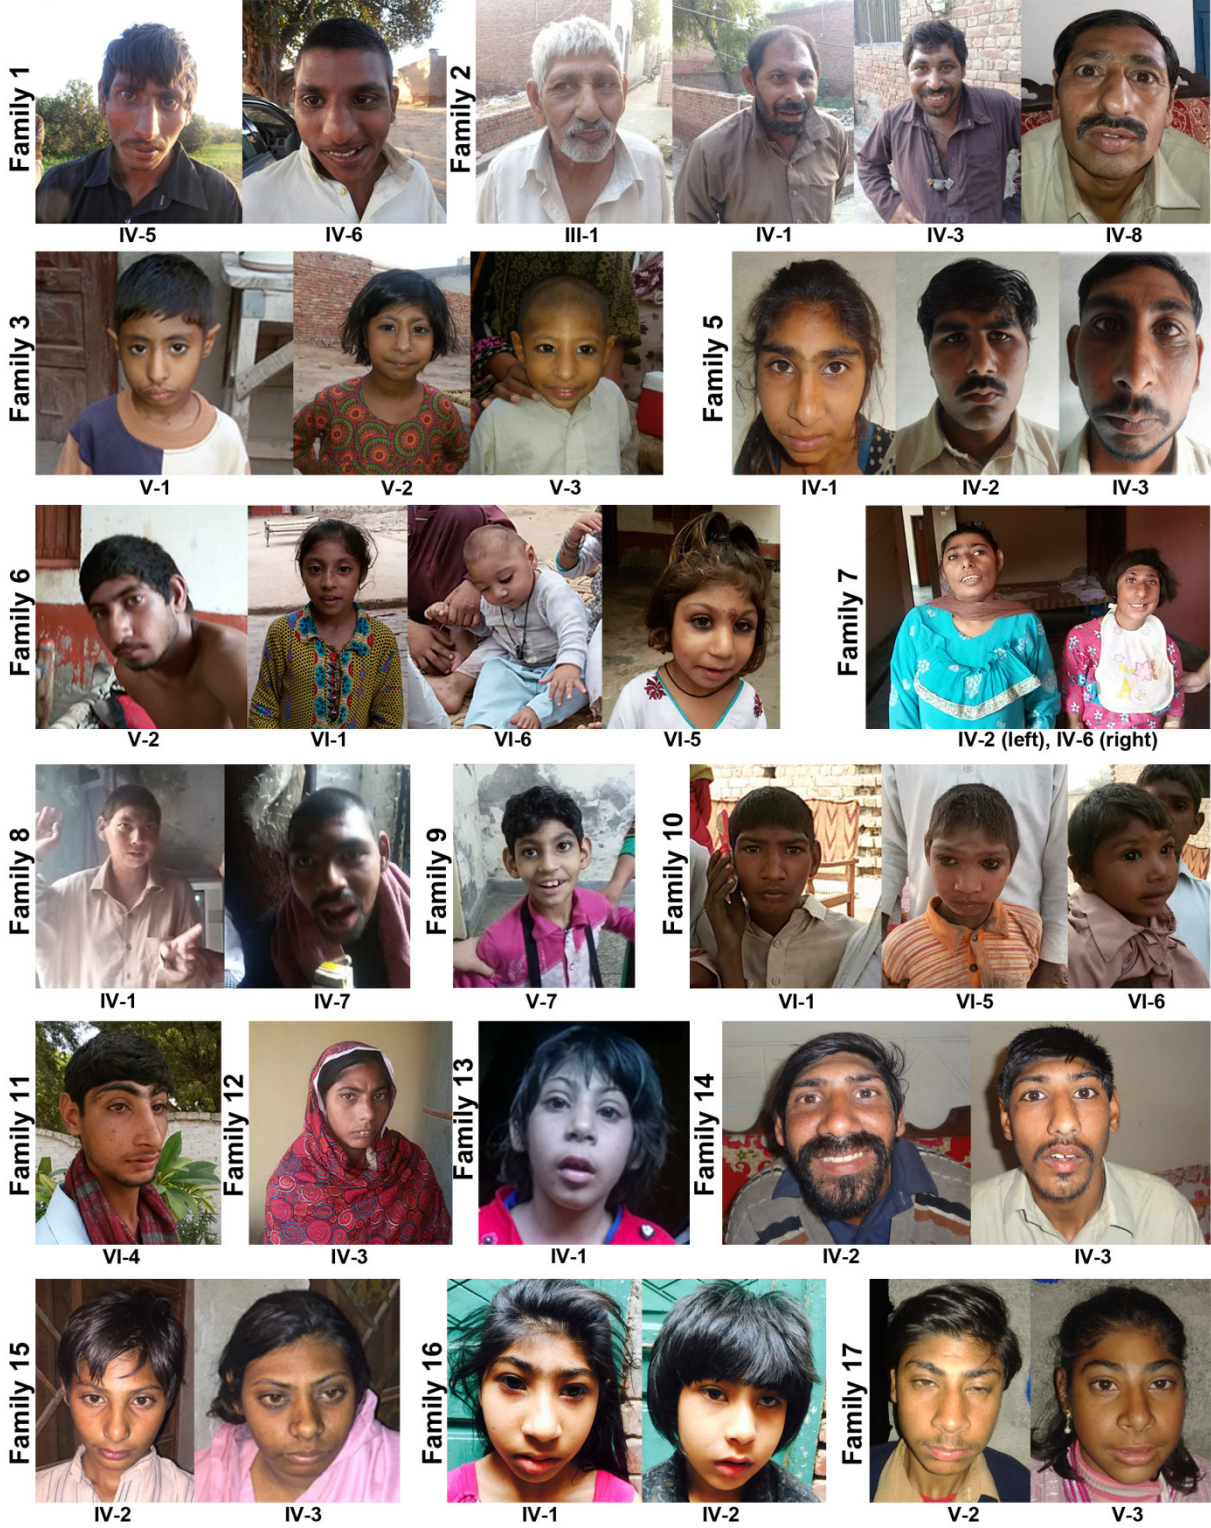

**FIGURE S2**

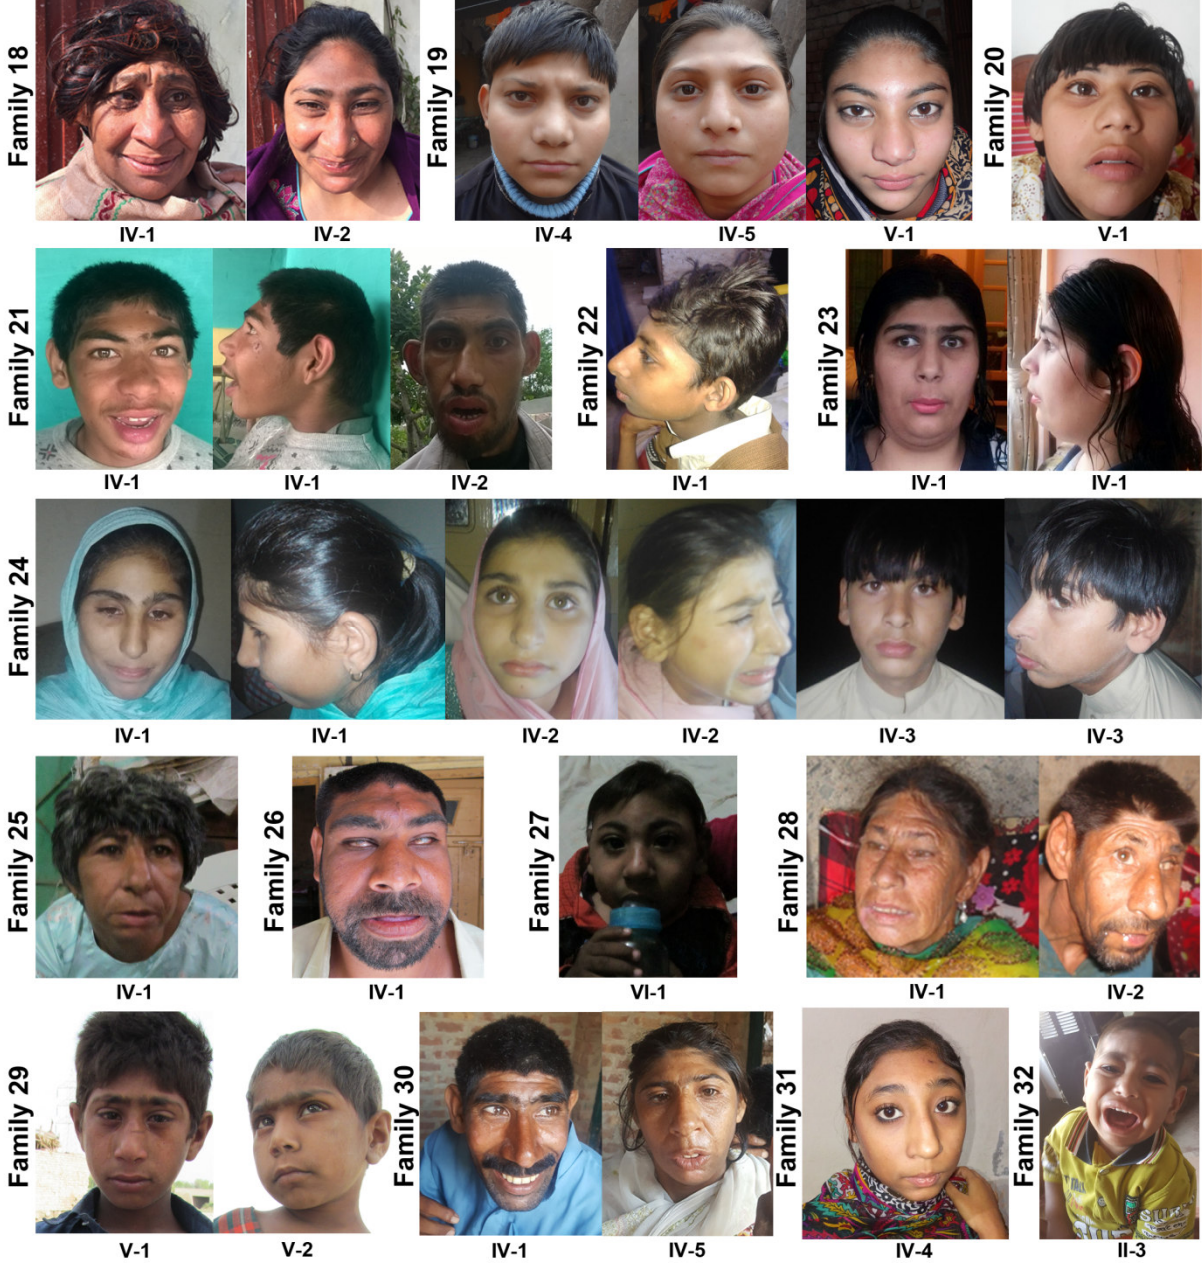

**FIGURE S2**  
microcephaly

Photographs of 32 MCPH Pakistani families manifesting primary



**FIGURE S3**

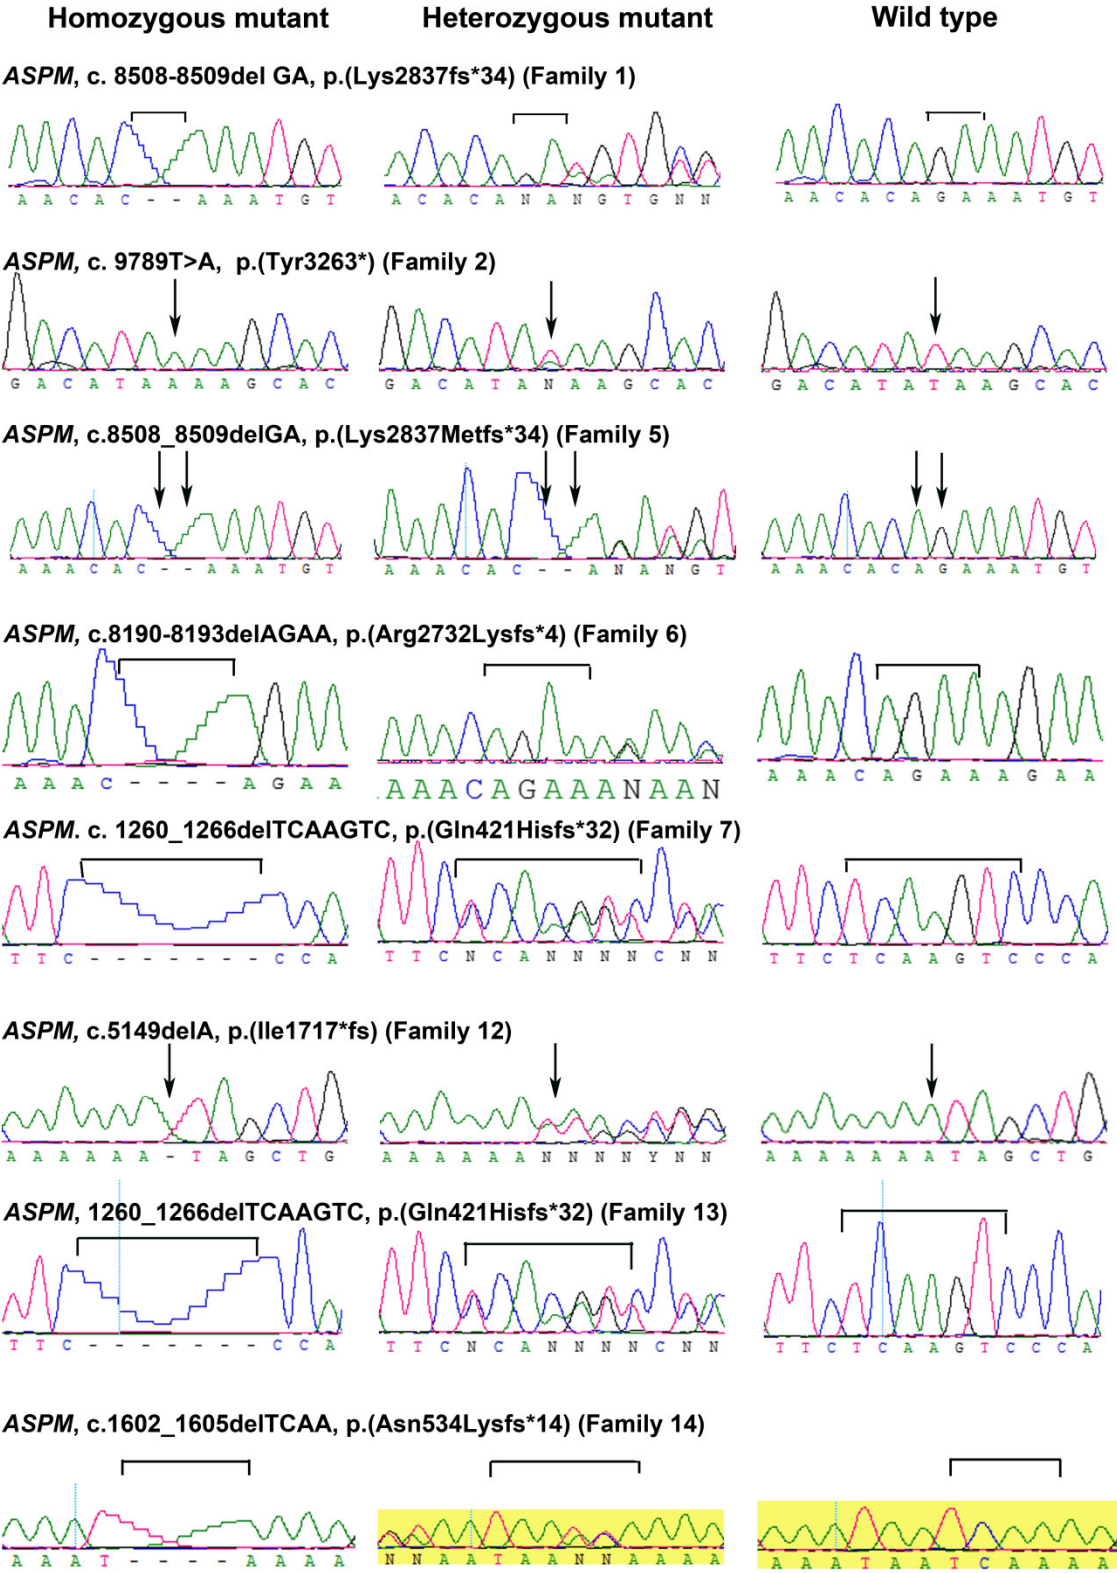

**FIGURE S3**

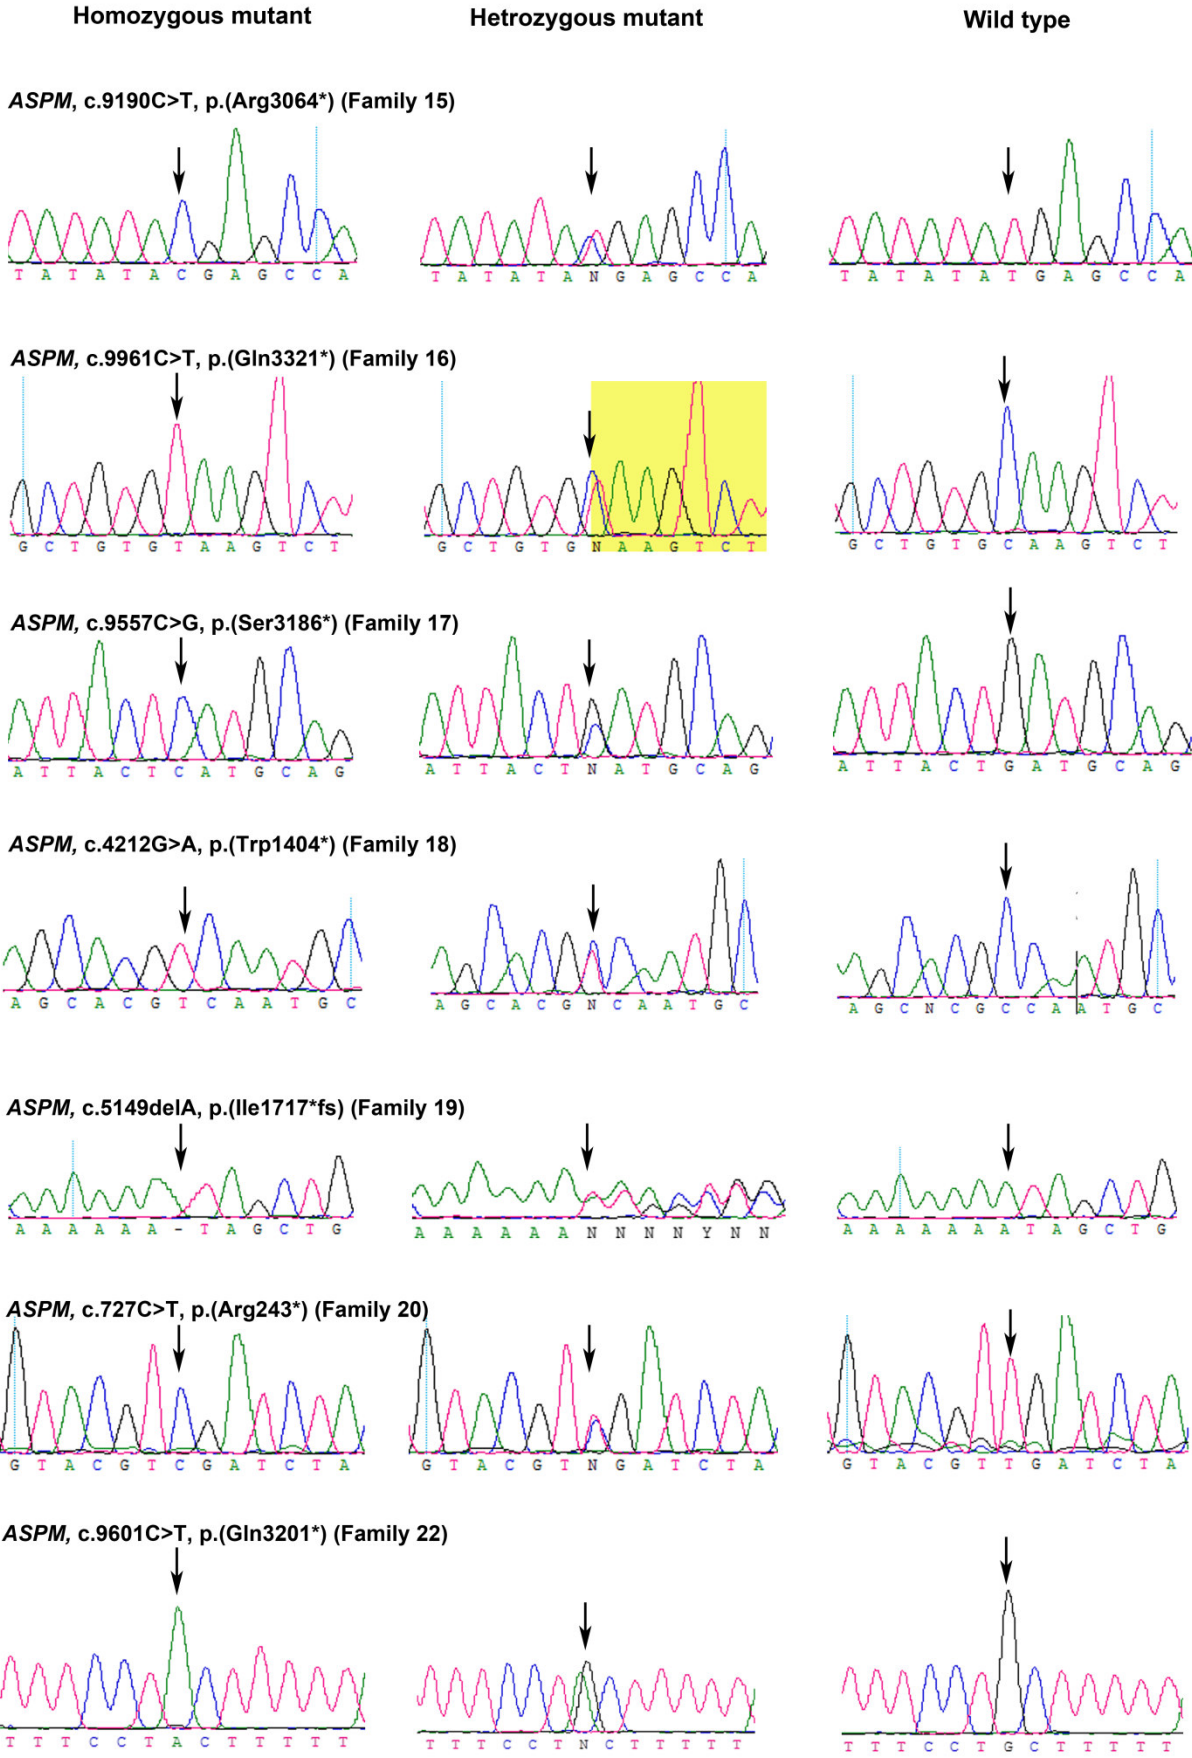

**FIGURE S3**

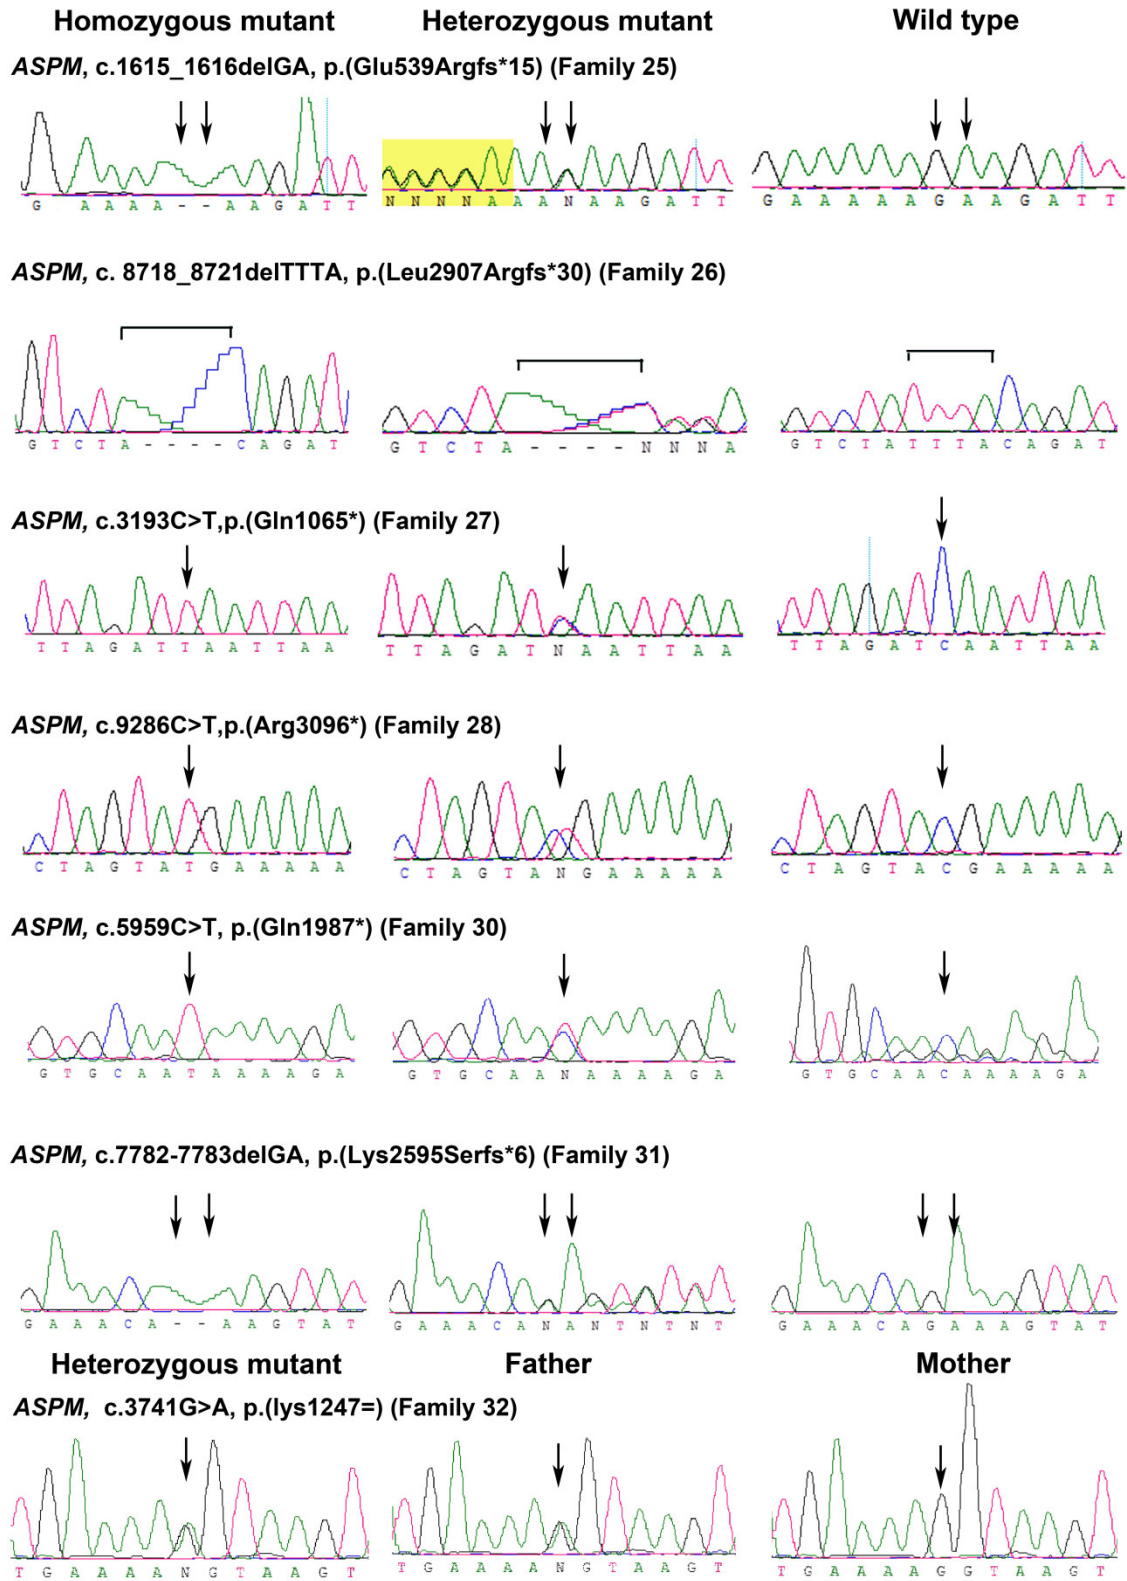

**FIGURE S3**

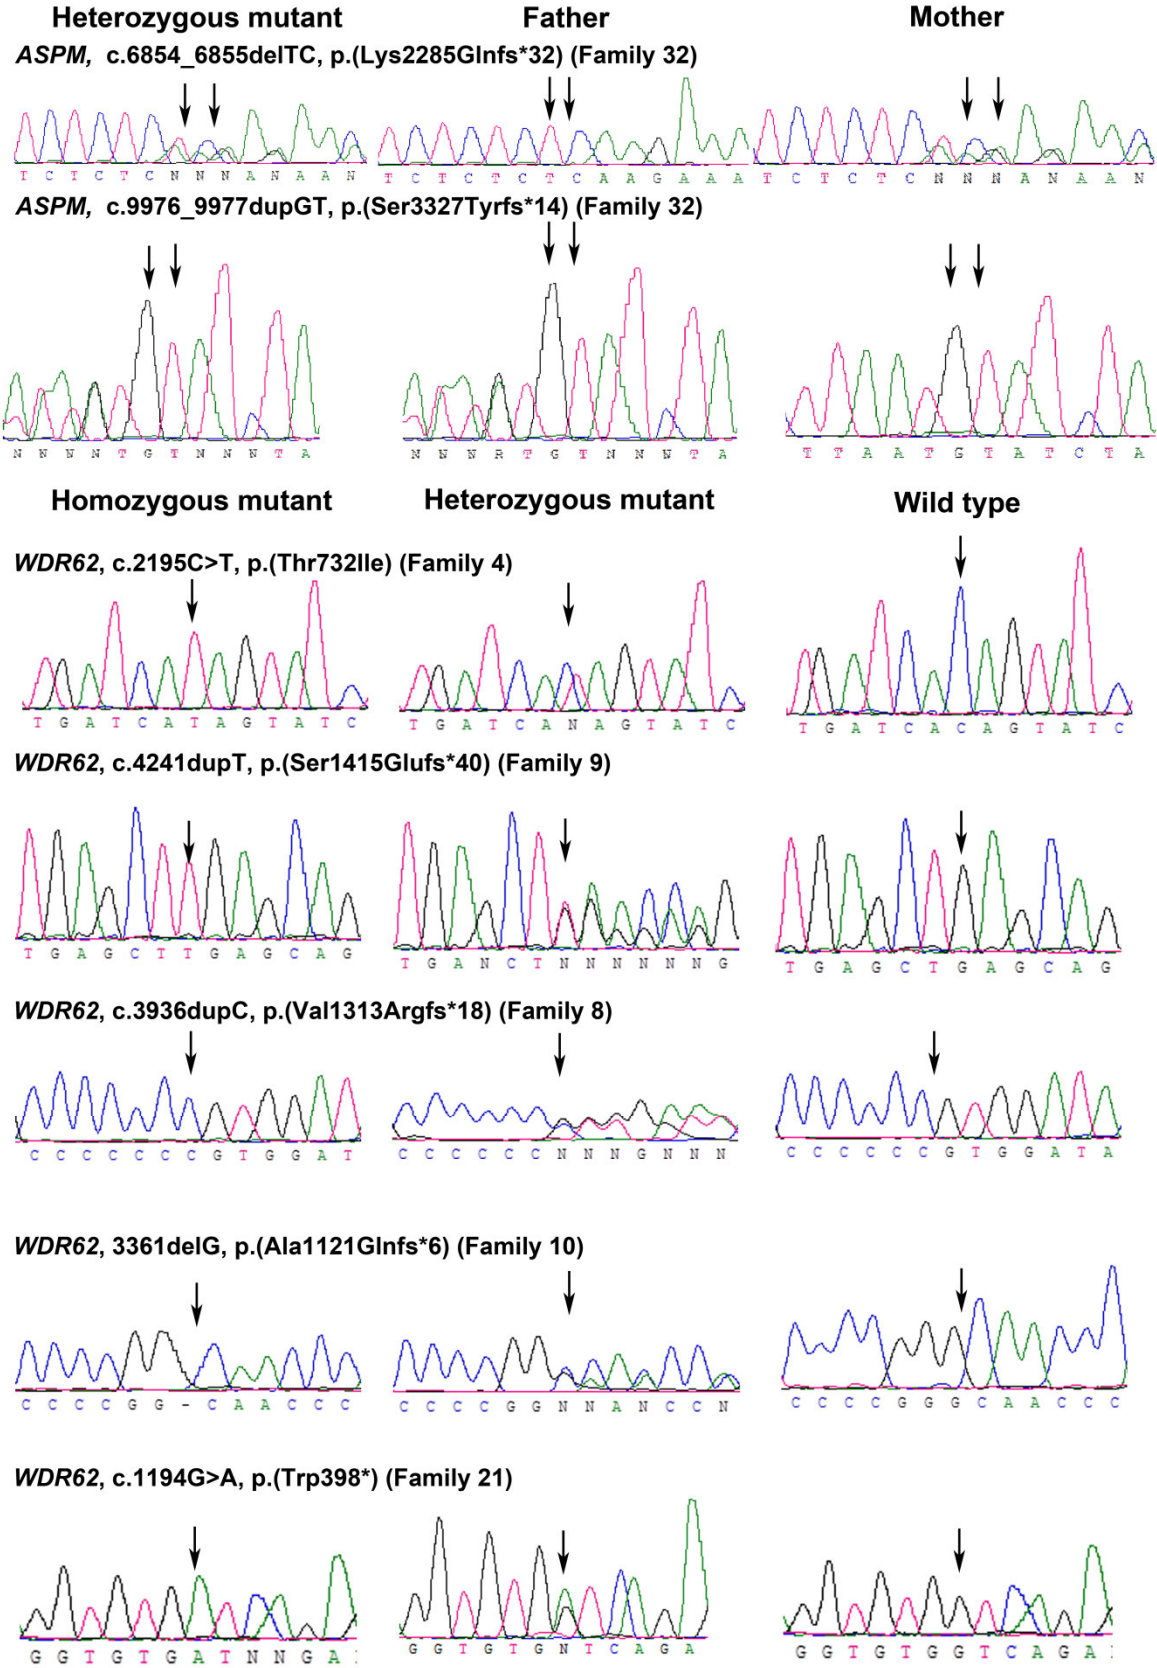

**FIGURE S3**

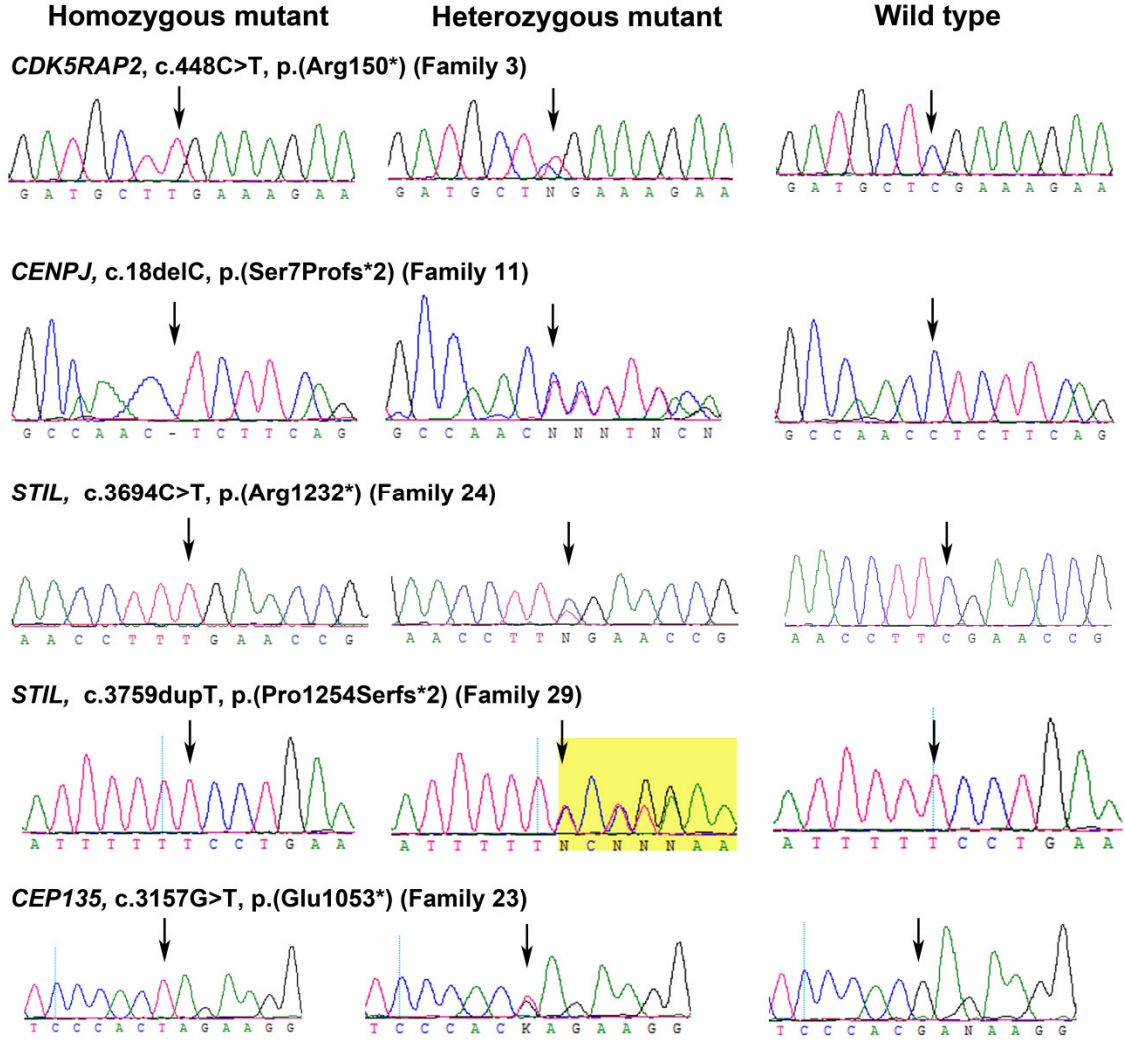

**FIGURE S3** Sanger traces of identified mutations in *ASPM*, *WDR62*, *CDK5RAP2*, *CENPJ*, *STIL* and *CEP135*

**FIGURE S4**

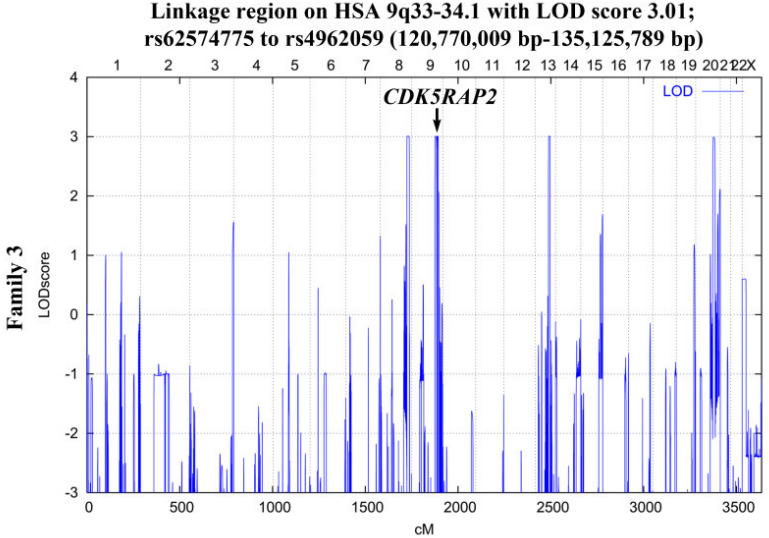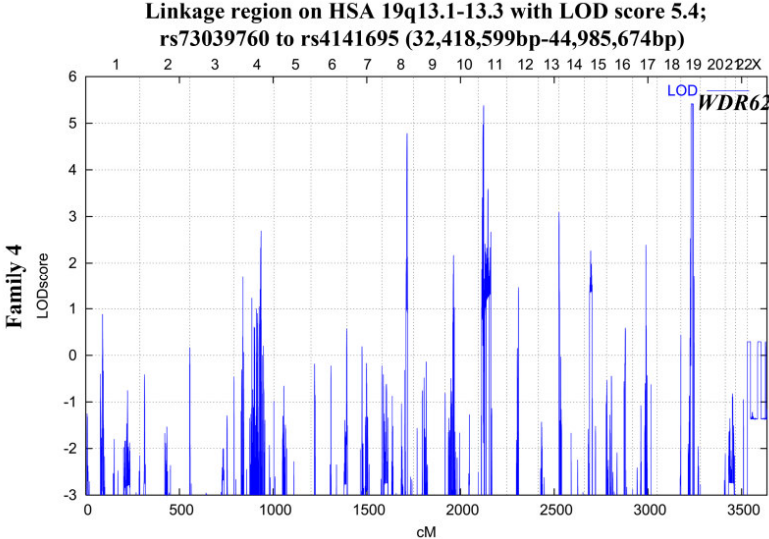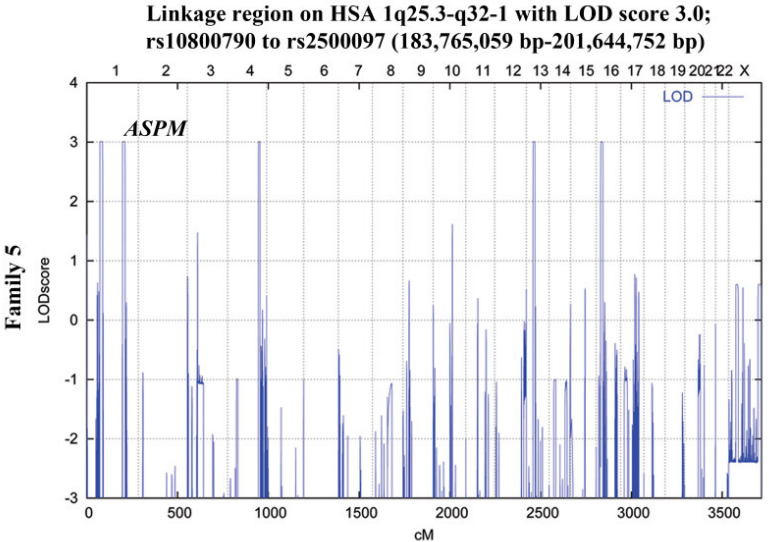

**FIGURE S4**

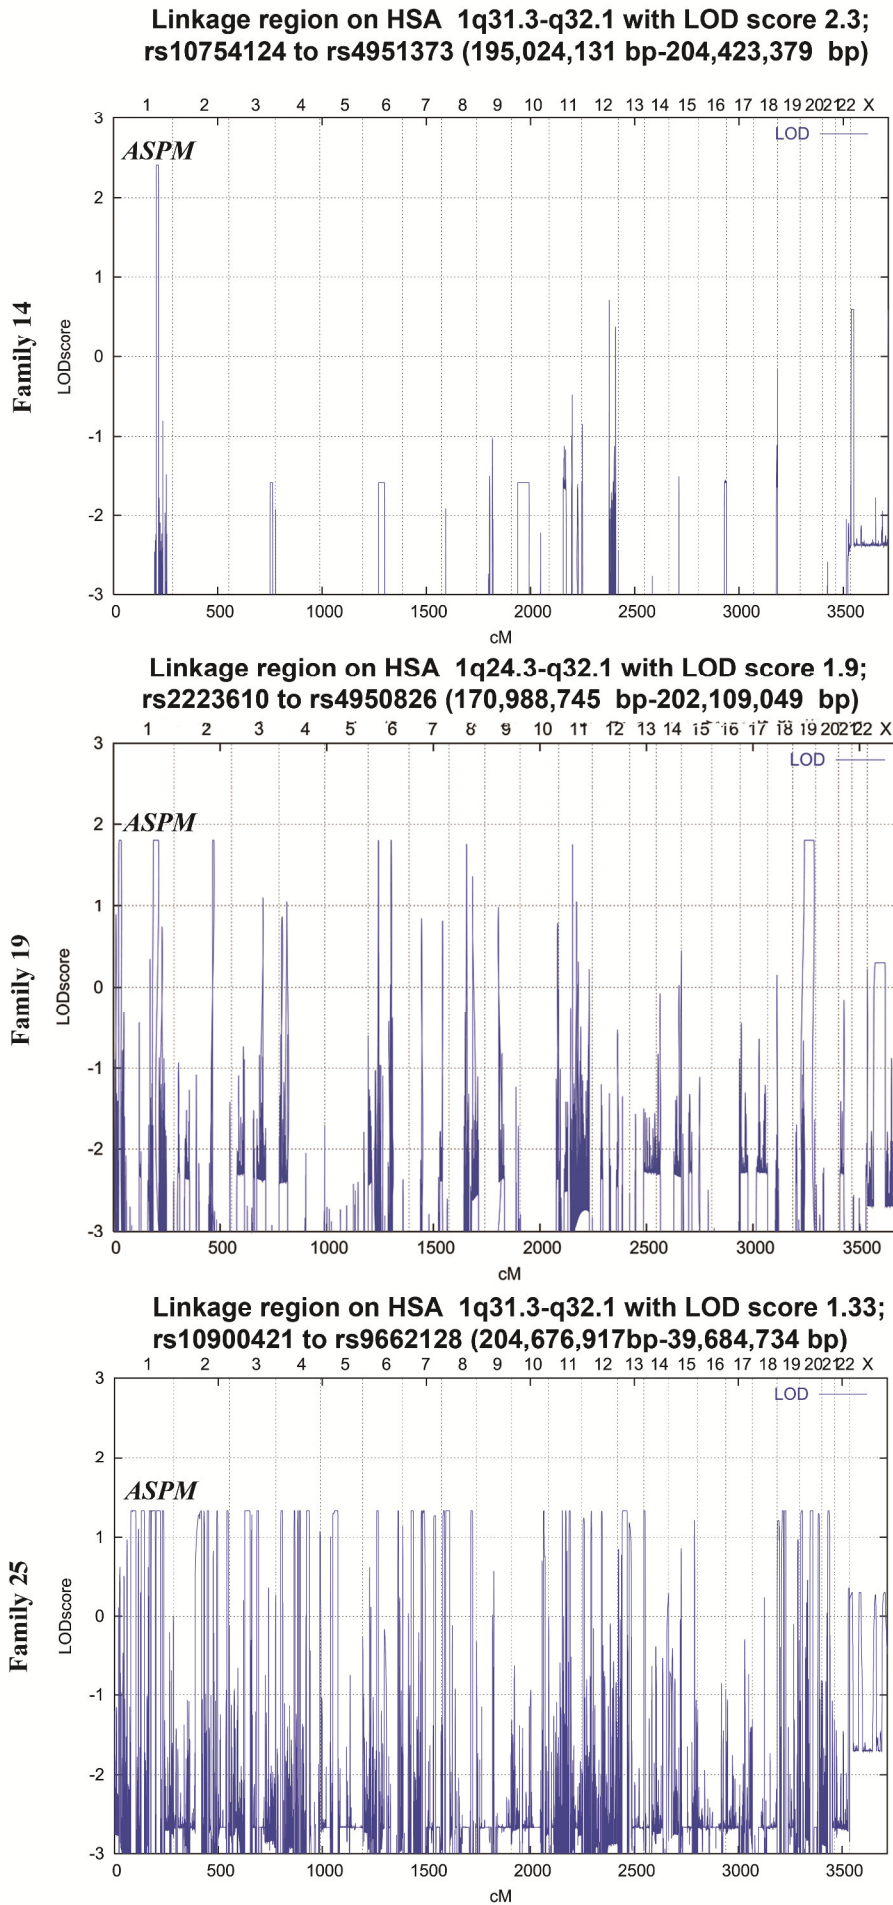

**FIGURE S4**

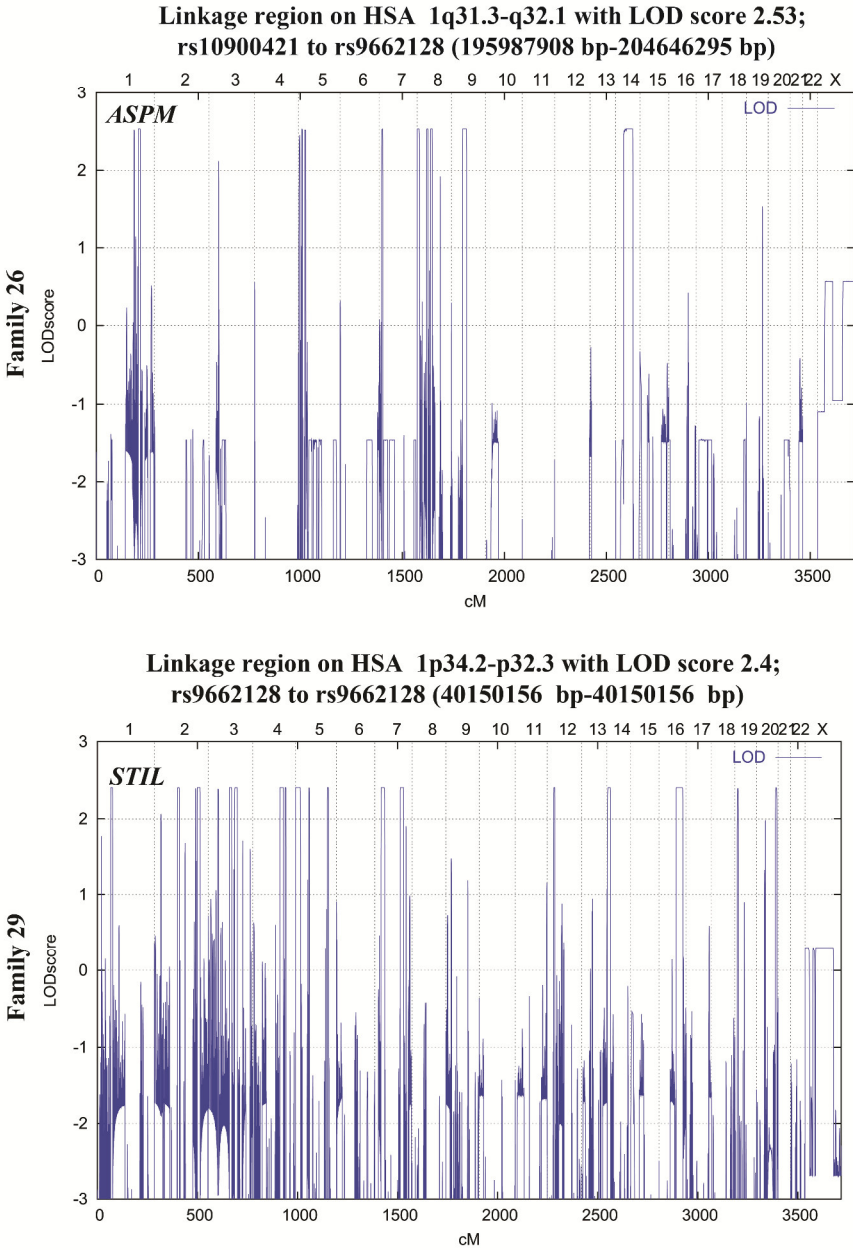

**FIGURE S4** Genome-wide graphical views showing the homozygous segments along with the location of the respective causative gene at specific chromosomal region
