# Supplementary material for: An update of pathogenic variants in ASPM, WDR62, CDK5RAP2, STIL, CENPJ, and CEP135 underlying autosomal recessive primary microcephaly in 32 consanguineous families from Pakistan
Source: PubMed Central journal article supplement (PMC7507472; doi:10.1002/mgg3.1408), 2020-07-17
Supplement: MGG3-8-e1408-s002.pdf [file MGG3-8-e1408-s002.pdf]

**TABLE S1** MCPH associated genes and the localization of their respective proteins

| <b>Gene</b>                                                                                                                                               | <b>Protein</b>                                                                                                                                            | <b>Cellular localization</b>                                     | <b>References</b>                                                                                                                                                                                                                                    |
|-----------------------------------------------------------------------------------------------------------------------------------------------------------|-----------------------------------------------------------------------------------------------------------------------------------------------------------|------------------------------------------------------------------|------------------------------------------------------------------------------------------------------------------------------------------------------------------------------------------------------------------------------------------------------|
| <i>MCPH1</i> ,<br><i>CDK5RAP2</i> ,<br><i>CENPJ</i> , <i>STIL</i> ,<br><i>CEP135</i> ,<br><i>CEP152</i> ,<br><i>CDK6</i> <i>SASS6</i><br>and <i>CENPE</i> | MCPH1,<br>CDK5RAP2, CENP-<br>J, STIL, CEP135,<br>CEP152, CDK6,<br>HsSAS-6 and<br>CENP-E                                                                   | Centrosome                                                       | (Bond et al., 2005;<br>Guernsey et al., 2010;<br>Hussain et al., 2012;<br>Hussain et al., 2013;<br>Jackson et al., 2002;<br>Jeffers, Coull, Stack, &<br>Morrison, 2008; M. A. Khan<br>et al., 2017; Kumar,<br>Girimaji, Duvvari, & Blanton,<br>2009) |
| <i>WDR62</i> ,<br><i>ASPM</i> ,<br><i>CENPE</i> and<br><i>MAP11</i>                                                                                       | WDR62, ASPM,<br>CENP-E and<br>MAP11                                                                                                                       | Spindle pole                                                     | (Nicholas et al., 2010; Perez<br>et al., 2019; Shen et al.,<br>2005)                                                                                                                                                                                 |
| <i>KNL1</i> , <i>CENPE</i><br>and <i>NUP37</i>                                                                                                            | KNL1, CENP-E and<br>NUP37                                                                                                                                 | Kinetochores                                                     | (Braun et al., 2018; Genin et<br>al., 2012; Mirzaa et al.,<br>2014)                                                                                                                                                                                  |
| <i>ZNF335</i> ,<br><i>PHC1</i> ,<br><i>NCAPD2</i> ,<br><i>NCAPD3</i> , and<br><i>NCAPH</i>                                                                | ZNF335, PHC1,<br>Condensin complex<br>subunit 1 (hCAP-<br>D2), Condensin-2<br>complex subunit D3<br>(hCAP-D3),<br>Condensin complex<br>subunit 2 (hCAP-H) | Components<br>of Chromatin-<br>remodeling<br>complex/Nucle<br>us | (Awad et al., 2013; Martin et<br>al., 2016; Yang et al., 2012)                                                                                                                                                                                       |
| <i>MFSD2A</i> ,<br><i>ANKLE2</i> , and<br><i>COPB2</i>                                                                                                    | NLS1, Ankyrin<br>repeat and LEM<br>domain-containing<br>protein 2, Coatomer<br>subunit beta (Beta'-<br>COP)                                               | Plasma<br>membrane                                               | (DiStasio et al., 2017;<br>Guemez-Gamboa et al.,<br>2015; Yamamoto et al.,<br>2014)                                                                                                                                                                  |
| <i>WDFY3</i> ,<br><i>NCAPD2</i> , and<br><i>NCAPH</i>                                                                                                     | WD repeat and<br>FYVE domain-<br>containing protein 3<br>(Alfy), Condensin<br>complex subunit 1<br>(hCAP-D2),<br>Condensin complex<br>subunit 2 (hCAP-H)  | Cytosol                                                          | (Kadir et al., 2016; Martin et<br>al., 2016)                                                                                                                                                                                                         |
| <i>CIT</i> , <i>KIF14</i><br>and <i>MAP11</i>                                                                                                             | CIT, KIF14 and<br>MAP11                                                                                                                                   | Cleavage<br>furrow and<br>midbody of<br>dividing cells           | (Basit et al., 2016; Moawia<br>et al., 2017; Perez et al.,<br>2019) 2019)                                                                                                                                                                            |
| <i>NUP37</i>                                                                                                                                              | NUP37                                                                                                                                                     | Nuclear<br>envelope                                              | (Braun et al., 2018)                                                                                                                                                                                                                                 |

**TABLE S2** List of genes included in gene panel for next generation sequencing

|                 |                 |
|-----------------|-----------------|
| <i>MCPH1</i>    | <i>TBC1D20</i>  |
| <i>WDR62</i>    | <i>RAD50</i>    |
| <i>CDK5RAP2</i> | <i>CASK</i>     |
| <i>CASC5</i>    | <i>SLC25A19</i> |
| <i>ASPM</i>     | <i>SLC9A6</i>   |
| <i>CENPJ</i>    | <i>MECP2</i>    |
| <i>STIL</i>     | <i>TUBGCP6</i>  |
| <i>CEP135</i>   | <i>ARFGEF2</i>  |
| <i>CEP152</i>   | <i>TRAPPC9</i>  |
| <i>ZNF335</i>   | <i>TSEN2</i>    |
| <i>PHC1</i>     | <i>TSEN34</i>   |
| <i>CDK6</i>     | <i>TSEN54</i>   |
| <i>SASS6</i>    | <i>MED17</i>    |
| <i>NDE1</i>     | <i>CDKL5</i>    |
| <i>CKAP2L</i>   | <i>ATRX</i>     |
| <i>ORC1</i>     | <i>FOXP1</i>    |
| <i>ORC4</i>     | <i>TCF4</i>     |
| <i>ORC6</i>     | <i>DYRK1A</i>   |
| <i>CDT1</i>     | <i>KIF11</i>    |
| <i>CDC6</i>     | <i>SLC2A1</i>   |
| <i>ATR</i>      | <i>UBE3A</i>    |
| <i>RBBP8</i>    | <i>ZEB2</i>     |
| <i>ATRIP</i>    | <i>WDR81</i>    |
| <i>RNU4ATAC</i> | <i>CEP290</i>   |
| <i>CENPE</i>    | <i>OFD1</i>     |
| <i>DNA2</i>     | <i>CCP110</i>   |
| <i>PCNT</i>     | <i>CEP97</i>    |
| <i>CEP63</i>    | <i>CEP76</i>    |
| <i>NIN</i>      | <i>CNTROB</i>   |
| <i>PLK4</i>     | <i>POC5</i>     |
| <i>XRCC4</i>    | <i>SPICE1</i>   |
| <i>IGF1</i>     | <i>KIAA1279</i> |
| <i>LIG4</i>     | <i>HMGB3</i>    |
| <i>CRIP1</i>    | <i>PQBP1</i>    |
| <i>IER3IP1</i>  | <i>UBE3B</i>    |
| <i>TRMT10A</i>  | <i>FAR1</i>     |
| <i>STAMBP</i>   | <i>NSDHL</i>    |
| <i>NBN</i>      | <i>ZBTB18</i>   |
| <i>NHEJ1</i>    | <i>CEP120</i>   |
| <i>PNKP</i>     | <i>CEP192</i>   |
| <i>RAB18</i>    | <i>NLRP2</i>    |
| <i>RAB3GAP1</i> | <i>QARS</i>     |
| <i>RAB3GAP2</i> | <i>WDR73</i>    |

**TABLE S3** Clinical manifestations of the studied MCPH cohort

| Family - Individual                                                      | Gene            | Mutation information                             | No. of affected individuals | Age at examination (years)             | OFC (cm)                               | OFC (SD)                                       | Observed clinical manifestation                                                                                                                                                                                                                                                                                                                                                                  |
|--------------------------------------------------------------------------|-----------------|--------------------------------------------------|-----------------------------|----------------------------------------|----------------------------------------|------------------------------------------------|--------------------------------------------------------------------------------------------------------------------------------------------------------------------------------------------------------------------------------------------------------------------------------------------------------------------------------------------------------------------------------------------------|
| <b>Fam.1</b><br>-IV-5<br>-IV-6                                           | <i>ASPM</i>     | NM_018136.4;c.8508_8509delGA;p.(Lys2837Metfs*34) | 2                           | 16<br>14                               | 43<br>45.5                             | -8<br>-6                                       | -Mild level of mental retardation, normal motor skills, normal speech and health<br>-Mild level of intellectual disability, speech impairment, normal motor skills                                                                                                                                                                                                                               |
| <b>Fam. 2</b><br>-III-1<br><br>-III-6<br>-IV-1<br><br>-IV-3<br><br>-IV-8 | <i>ASPM</i>     | NM_018136.4;c.9789T>A;p.(Tyr3263*)               | 5                           | 55<br><br>NA<br>36<br><br>33<br><br>30 | 43<br><br>NA<br>43<br><br>43<br><br>43 | -8.2<br><br>NA<br>-8.2<br><br>-8.2<br><br>-8.2 | -Mild mental retardation, can speak few words, normal motor skills, no seizures, self-care skills<br>-NA<br>-Mild intellectual disability, can speak few words, normal motor skills and self-care skills<br>-Mild level mental retardation, normal motor skills, no fits, impaired speech<br>-Mild mental retardation, can speak reluctantly, friendly behavior, no physical abnormality         |
| <b>Fam. 3</b><br>-V-1<br><br>-V-2<br><br>-V-3                            | <i>CDK5RAP2</i> | NM_018249.5;c.448C>T;p.(Arg150*)                 | 3                           | 10<br><br>8<br><br>5                   | 39<br><br>37<br><br>35.5               | -10<br><br>-12<br><br>-12                      | -Developmental delay, mild level of intellectual disability, self-care skills, physically weak, normal motor skills, speech impairment, short stature (-5 SD)<br>-Moderate intellectual disability, retarded growth, can speak few words, no history of seizures, reduced height (-5SD)<br>-Mild mental retardation, development delayed and impaired speech, hyperactive, short stature (-6 SD) |

|                                                                          |              |                                                              |   |                                            |                                        |                                               |                                                                                                                                                                                                                                                                                                                                                                                                             |
|--------------------------------------------------------------------------|--------------|--------------------------------------------------------------|---|--------------------------------------------|----------------------------------------|-----------------------------------------------|-------------------------------------------------------------------------------------------------------------------------------------------------------------------------------------------------------------------------------------------------------------------------------------------------------------------------------------------------------------------------------------------------------------|
| <b>Fam. 4</b><br>-V-4<br>-V-6<br>-VI-1<br>-VI-3<br>-VI-4                 | <i>WDR62</i> | NM_001083961.1;<br>c.2195C>T;p.(Thr732Ile)                   | 5 | 08<br>18<br>08<br>11<br>02                 | 38<br>38<br>39<br>38<br>40.5           | -11<br>-12.5<br>-9.5<br>-10<br>-7             | -Mild level of intellectual disability, speech impairment, delayed milestones<br>-Mild intellectual disability, short stature (-6 SD), normal motor skills<br>-Mild mental retardation, imprecise articulation, normal motor skills, seizures<br>-Mild intellectual disability, delayed milestones, normal motor skills<br>-Moderate level of intellectual disability , impaired speech, strabismus         |
| <b>Fam. 5</b><br>-IV-1<br>-IV-2<br>-IV-3<br>-V-1                         | <i>ASPM</i>  | NM_018136.4;<br>c.8508_8509delGA;p.(Lys2837Metfs*34)         | 4 | NA<br>27<br>18<br>9 months                 | NA<br>43<br>47<br>33.5                 | NA<br>-8.5<br>-6<br>-8                        | -Severe intellectual disability, aggressive behavior, indifferent to personal care<br>-Mild intellectual disability, aggressive behavior, able to perform personal care<br>-Mild intellectual disability, aggressive behavior, self-care skills<br>-Severe intellectual disability, aggressive behavior, indifferent to personal care                                                                       |
| <b>Fam.6</b><br>-IV-1<br>-V-2<br>-V-3<br>-V-9<br>-VI-1<br>-VI-5<br>-VI-6 | <i>ASPM</i>  | NM_018136.4; c.<br>8190_8193delAGAA;p.(Arg2732Lysfs*4)       | 7 | NA<br>30<br>17<br>NA<br>8<br>4<br>9 months | NA<br>NA<br>38<br>NA<br>39<br>38<br>35 | NA<br>NA<br>-11.5<br>NA<br>-10.5<br>-11<br>-9 | -NA<br>-NA<br>-Moderate level of intellectual disability, dumbfounded, aggressive and self-harming behavior<br>-NA<br>-Mild intellectual disability, dumbfounded, self-care skills and normal motor skills<br>-Moderate intellectual disability, dumbfounded, no self-care skills, aggressive behavior, self-injurious behavior<br>-Normal health and early milestone, can sit and crawl, physically active |
| <b>Fam. 7</b><br>-IV-1<br>-IV-2                                          | <i>ASPM</i>  | NM_018136.4;<br>c.1260_1266delTCAAGT<br>C;p.(Gln421Hisfs*32) | 3 | NA<br>34                                   | NA<br>39.5                             | NA<br>-11.5                                   | -Mild intellectual disability, self-care skills, imprecise articulation<br>-Severe intellectual disability, hyperactive, can speak a few words, no self-care skills, aggressive                                                                                                                                                                                                                             |

|                                                                |              |                                                    |   |                                  |                                  |                                  |                                                                                                                                                                              |
|----------------------------------------------------------------|--------------|----------------------------------------------------|---|----------------------------------|----------------------------------|----------------------------------|------------------------------------------------------------------------------------------------------------------------------------------------------------------------------|
| -IV-6                                                          |              |                                                    |   | 30                               | 38                               | -12.5                            | behavior, self-injurious<br>-Mild intellectual disability, self-care skills, imprecise articulation                                                                          |
| <b>Fam. 8</b><br>-IV-1                                         | <i>WDR62</i> | NM_001083961.1;<br>c.3936dupC;p.(Val1313Argfs*18)  | 3 | 30                               | 43                               | -10.7                            | -Moderate intellectual disability, no self-care skills, fits, aggressive behavior starts beating and scolding in anger                                                       |
| -IV-3                                                          |              |                                                    |   | 26                               | 43                               | -8                               | -Mild mental retardation, self-care skills                                                                                                                                   |
| -IV-7                                                          |              |                                                    |   | 22                               | 45                               | -6.8                             | -mild mental disability, history of fits with bleeding from the mouth                                                                                                        |
| <b>Fam. 9</b><br>-IV-3<br>-V-2<br>-V-3<br>-V-4<br>-V-5<br>-V-7 | <i>WDR62</i> | NM_001083961.1;<br>c.4241dupT;p.(Ser1415Gluufs*40) | 7 | NA<br>NA<br>NA<br>NA<br>NA<br>29 | NA<br>NA<br>NA<br>NA<br>NA<br>43 | NA<br>NA<br>NA<br>NA<br>NA<br>-8 | -NA<br>-NA<br>-NA<br>-NA<br>-NA<br>-Mild intellectual disability, aggressive behavior, history of seizure, one leg lost in an accident, no self-care skills, impaired speech |
| -V-10                                                          |              |                                                    |   | 8                                | 38                               | -10                              | -Moderate level of intellectual disability, dumbfounded, aggressive behavior, self-punishing as well as beating others, no self-care skills                                  |
| <b>Fam.10</b><br>-V-1<br>-V-3<br>-VI-1                         | <i>WDR62</i> | NM_001083961.1;<br>c.3361delG;p.(Ala1121Gluufs*6)  | 5 | NA<br>NA<br>16                   | NA<br>NA<br>45                   | NA<br>NA<br>-6.8                 | -NA<br>-NA<br>-Moderate level of intellectual disability, impaired speech, no self-care skills, aggressive behavior                                                          |
| -VI-5                                                          |              |                                                    |   | 7                                | 43                               | -7                               | -Mild intellectual disability, dumbfounded, no self-care skills, normal motor skills                                                                                         |
| -VI-6                                                          |              |                                                    |   | 2                                | 37                               | -9.8                             | -Mild intellectual disability, dumbfounded, no self-care skills, normal early milestones                                                                                     |
| <b>Fam. 11</b><br>-IV-1<br>-VI-3<br>-VI-4                      | <i>CENPJ</i> | NM_018451.4;<br>c.18delC;p.(Ser7Profs*2)           | 3 | NA<br>NA<br>18                   | NA<br>NA<br>44.5                 | NA<br>NA<br>-7.5                 | -NA<br>-NA<br>-Mild intellectual disability, dumbfounded, self-care skills, normal motor skills                                                                              |

|                                                  |             |                                                              |   |                        |                        |                         |                                                                                                                                                                                                                                                                   |
|--------------------------------------------------|-------------|--------------------------------------------------------------|---|------------------------|------------------------|-------------------------|-------------------------------------------------------------------------------------------------------------------------------------------------------------------------------------------------------------------------------------------------------------------|
| <b>Fam. 12</b><br>-IV-3<br><br>-IV-7             | <i>ASPM</i> | NM_018136.4;<br>c.5149delA;p.(Ile1717*)                      | 2 | 25<br><br>13           | 45<br><br>39           | -8<br><br>-10           | -Mild intellectual disability, impaired speech, self-care skills, normal motor skills<br>-Mild level of intellectual disability, physically active, can speak only a few words, aggressive behavior                                                               |
| <b>Fam.13</b><br>-IV-1<br><br>-IV-2              | <i>ASPM</i> | NM_018136.4;<br>c.1260_1266delTCAAGT<br>C;p.(Gln421Hisfs*32) | 2 | 4<br><br>6             | 36<br><br>38           | -9<br><br>-11           | -Mild level of intellectual disability, speech impairment<br>-Moderate intellectual disability, no self-care skills, aggressive behavior                                                                                                                          |
| <b>Fam.14</b><br>-IV-1<br><br>-IV-2<br><br>-IV-3 | <i>ASPM</i> | NM_018136.4;<br>c.1602_1605delTCAA;p.(<br>Asn534Lysfs*14)    | 3 | 2<br><br>2<br><br>NA   | 40<br><br>41<br><br>NA | -9<br><br>-11<br><br>NA | -Moderate level of intellectual disability, dumbfounded, bilateral hearing impairment, small anterior fontanel was also observed<br>-Moderate intellectual disability, dumbfounded, bilateral hearing impairment, Small anterior fontanel was also noticed<br>-NA |
| <b>Fam.15</b><br>-IV-1<br><br>-IV-2<br><br>-IV-3 | <i>ASPM</i> | NM_018136.4;<br>c.9190C>T;p.(Arg3064*)                       | 3 | 12<br><br>17<br><br>NA | 42<br><br>44<br><br>NA | -7<br><br>-9<br><br>NA  | -Mild intellectual disability, no hearing or vision impairment, normal self-care skills<br>-Mild level of intellectual disability without any other gross abnormality<br>-NA                                                                                      |
| <b>Fam. 16</b><br>-IV-1<br>-IV-2<br><br>-IV-3    | <i>ASPM</i> | NM_018136.4;<br>c.9961C>T;p.(Gln3321*)                       | 3 | 3<br>9<br><br>NA       | 37<br>41<br><br>NA     | -7<br>-10<br><br>NA     | -Moderate intellectual disability, speech impairment.<br>-Moderate level of intellectual disability, dumbfounded without any other physical or facial anomaly<br>-NA                                                                                              |
| <b>Fam.17</b><br>-V-1<br>-V-2<br><br>-V-3        | <i>ASPM</i> | NM_018136.4;<br>c.9557C>G;p.(Ser3186*)                       | 3 | 24<br>15<br><br>NA     | 38<br>41<br><br>NA     | -10<br>-9.5<br><br>NA   | -Severe intellectual disability, no self-care skills, stutter<br>-Severe intellectual disability, aggressive, no self-care skills<br>-NA                                                                                                                          |

|                                                      |               |                                           |   |                         |                            |                              |                                                                                                                                                                                                                                |
|------------------------------------------------------|---------------|-------------------------------------------|---|-------------------------|----------------------------|------------------------------|--------------------------------------------------------------------------------------------------------------------------------------------------------------------------------------------------------------------------------|
| <b>Fam. 18</b><br>-IV-1<br>-IV-2<br>-IV-3            | <i>ASPM</i>   | NM_018136.4;<br>c.4212G>A;p.(Trp1404*)    | 2 | 30<br>45<br>NA          | 40<br>41<br>NA             | -10<br>-9<br>NA              | -Mild level of intellectual disability, dumbfounded<br>-Moderate intellectual impairment and delayed speech<br>-NA                                                                                                             |
| <b>Fam.19</b><br>-IV-3<br>-IV-4<br><br>-IV-5<br>-V-1 | <i>ASPM</i>   | NM_018136.4;<br>c.5149delA;p.(Ile1717*fs) | 4 | 2<br>16<br><br>NA<br>NA | 41<br>45.5<br><br>NA<br>NA | -6<br>-7<br><br>NA<br>NA     | -Moderate intellectual disability, self-care skills<br>-Moderate level of intellectual disability, normal self-care skills, cognitive impairment without any other physical abnormality<br>-NA<br>-NA                          |
| <b>Fam. 20</b><br>-V-1                               | <i>ASPM</i>   | NM_018136.4;<br>c.727C>T;p.(Arg243*)      | 1 | 11                      | 38                         | -12                          | -Mild intellectual disability, indifferent to personal care, excessive salivation, aggressive behavior, speech impairment                                                                                                      |
| <b>Fam. 21</b><br>-IV-1<br><br>-IV-2                 | <i>WDR62</i>  | NM_001083961.1;<br>c.1194G>A;p.(Trp398*)  | 2 | 15<br><br>24            | 48<br><br>44:5             | -5<br><br>-5:5               | -Severe intellectual disability, aggressive behavior, able to self-care without the ability of self-feeding.<br>-Seizures, moderate intellectual disability, speech impairment                                                 |
| <b>Fam. 22</b><br>-IV-1                              | <i>ASPM</i>   | NM_018136.4;<br>c.9601C>T;p.(Gln3201*)    | 1 | 4                       | 35                         | -9                           | -Moderate intellectual disability, developmental delay, indifferent to personal care                                                                                                                                           |
| <b>Fam. 23</b><br>-IV-1                              | <i>CEP135</i> | NM_025009.4;<br>c.3157G>T;p.(Glu1053*)    | 1 | 27                      | 48                         | -7                           | -Mild intellectual disability, personal-care skills, autistic-like behavior, strabismus with normal vision, precise speech                                                                                                     |
| <b>Fam.24</b><br>-IV-1<br><br>-IV-2<br><br>-IV-3     | <i>STIL</i>   | NM_001048166.1;<br>c.3694C>T;p.(Arg1232*) | 3 | 15<br><br>11<br><br>13  | 45<br><br>44<br><br>44     | -6<br><br>-4.66<br><br>-6.66 | -Mild intellectual disability, able to perform personal care<br>-Mild intellectual disability, able to perform self-care functions<br>-Epileptic shocks started at the age of 10 years, aggressive behavior, speech impairment |

|                                                       |      |                                                             |   |                      |                      |                        |                                                                                                                                                                                                                                                                       |
|-------------------------------------------------------|------|-------------------------------------------------------------|---|----------------------|----------------------|------------------------|-----------------------------------------------------------------------------------------------------------------------------------------------------------------------------------------------------------------------------------------------------------------------|
| <b>Fam.25</b><br>-IV-1                                | ASPM | NM_018136.4;<br>c.1615_1616delGA;p.(Glu<br>539Argfs*15)     | 1 | 38                   | NA                   | NA                     | -Severe intellectual disability, indifferent to personal care                                                                                                                                                                                                         |
| <b>Fam.26</b><br>-IV-1<br>-IV-2                       | ASPM | NM_018136.4; c.<br>8718_8721delTTTA;p.(Le<br>u2907Argfs*30) | 2 | 35<br>31             | 45<br>42             | -6<br>-8               | -Severe intellectual disability, blurry vision, white spots on both hands, cup-shaped ears, imprecise articulation<br>-Severe intellectual disability, deafness, inability to walk, poliomyelitis in childhood                                                        |
| <b>Fam.27</b><br>-V-1<br>-VI-1                        | ASPM | NM_018136.4;<br>c.3193C>T;p.(Gln1065*)                      | 2 | NA<br>NA             | NA<br>NA             | NA<br>NA               | -Severe intellectual disability, poor self-care skills<br>-Severe intellectual disability and speech impairment, no personal-care skills                                                                                                                              |
| <b>Fam.28</b><br>IV-1<br>-IV-2<br>-IV-4               | ASPM | NM_018136.4;<br>c.9286C>T;p.(Arg3096*)                      | 3 | 47<br>45<br>42       | 40<br>38<br>NA       | -9.9<br>-9.7<br>NA     | -Classical primary microcephaly, profound intellectual disability, aggressive behavior<br>-Microcephaly, poor self-care skills, severe intellectual disability<br>-Small head size, indifferent to personal care, aggressive behavior, severe intellectual disability |
| <b>Fam.29</b><br>-V-1<br>-V-2                         | STIL | NM_001048166.1;<br>c.3759dupT;p.(Pro1254S<br>erfs*2)        | 2 | 12<br>5              | 42<br>42             | -8<br>-8               | -Mild intellectual disability, able to speak a few words, friendly behavior<br>-Mild intellectual disability, normal self-care skills, precise articulation without the ability to make a complete sentence                                                           |
| <b>Fam.30</b><br>-IV-1<br>-IV-2<br>-IV-4<br>-IV-5     | ASPM | NM_018136.4;<br>c.5959C>T; p.(Gln1987*)                     | 3 | 22<br>22<br>27<br>30 | NA<br>NA<br>45<br>45 | NA<br>NA<br>-5<br>-5.6 | -NA<br>-NA<br>-Profound intellectual disability, aggressive behavior, excessive salivation<br>-Poor self-care skills, profound intellectual disability                                                                                                                |
| <b>Fam. 31</b><br>-III-1<br>-III-2<br>-III-3<br>-IV-4 | ASPM | NM_018136.4;<br>c.7782_7783delGA;<br>p.(Lys2595Serfs*6)     | 4 | NA<br>NA<br>27<br>17 | NA<br>NA<br>NA<br>44 | NA<br>NA<br>NA<br>-6.5 | -NA<br>-NA<br>-NA<br>-Mild intellectual disability, precise speech, ability                                                                                                                                                                                           |



|                         |             |                                                                                                                                                                       |   |     |    |    |                                                                  |
|-------------------------|-------------|-----------------------------------------------------------------------------------------------------------------------------------------------------------------------|---|-----|----|----|------------------------------------------------------------------|
|                         |             |                                                                                                                                                                       |   |     |    |    | to perform self-care functions                                   |
| <b>Fam. 32</b><br>-II-3 | <i>ASPM</i> | NM_018136.4;<br>c.6854_6855delTC<br>p.(Leu2285Glnfs*32)<br><br>NM_018136.4;<br>c.9976_9977dupGT<br>p.(Ser3327Tyrfs*14)<br><br>NM_018136.4;c.3741G>A<br>; p.(Lys1247=) | 1 | 2.5 | 37 | -9 | -Normal early milestones, started walking at the age of 9 months |

Abbreviations: NA, not available; OFC; Occipitofrontal Circumference; SD, standard deviation.

**TABLE S4** List of disease causing DNA variants reported in *ASPM* after the report of Létard and colleagues (Letard et al., 2018).

| cDNA mutation                                       | Protein mutation                          | Origin                          | Disorder/<br>Zygoty | Reference                                                             |
|-----------------------------------------------------|-------------------------------------------|---------------------------------|---------------------|-----------------------------------------------------------------------|
| <b>c.727C&gt;T</b>                                  | <b>p.(Arg243*)</b>                        | <b>Pakistani/second cousin</b>  | <b>PM/H</b>         | <b>This Study (Family 20)</b>                                         |
| c.1386delC                                          | p.(Tyr462*)                               | Caucasian /non-consanguineous   | PM/H                | (Marakhonov et al., 2018)                                             |
| c.1402_1406del <sup>†</sup>                         | p.(Asn468Serfs*2)                         | Korean/non-consanguineous       | PM/CH               | (Moriwaki et al., 2019)                                               |
| <b>c.1602_1605delTCAA</b>                           | <b>p.(Asn534Lysfs*14)</b>                 | <b>Pakistani/first cousin</b>   | <b>PM/H</b>         | <b>This Study (Family 14)</b>                                         |
| <b>c.1615_1616delGA</b>                             | <b>p.(Glu539Argfs*15)</b>                 | <b>Pakistani/first cousin</b>   | <b>PM/H</b>         | <b>This Study (Family 25)</b>                                         |
| c.1952_1955delAAAC                                  | p.(Asn653Lysfs*14)                        | Saudi                           | PM/H                | (Shaheen et al., 2019)                                                |
| c.2738dupT                                          | p.(Cys914fs)                              | Iranian/consanguineous          | PM/H                | (Bazgir, Agha Gholizadeh, Sarvar, & Pakzad, 2019)                     |
| <b>c.3193C&gt;T</b>                                 | <b>p.(Gln1065*)</b>                       | <b>Pakistani/consanguineous</b> | <b>PM/H</b>         | <b>This Study (Family 27)</b>                                         |
| c.3384_3385dupT                                     | p.(Lys1129*)                              | Indian/first cousin             | PM/H                | (Bhargav, Sreedevi, Swapna, Vivek, & Kovvali, 2017)                   |
| c.3796G>T                                           | p.(Glu1266*)                              | Kosovan/non-consanguineous      | PM/H                | (Boonsawat et al., 2019)                                              |
| c.5219_5225delGAGGAT<br>A                           | p.(Arg1740Thrfs*7)                        | Turkish/consanguineous          | PM/H                | (McSherry et al., 2018)                                               |
| c.7543C>T                                           | p.(Arg2515*)                              | Pakistani/consanguineous        | PM/H                | (A. Khan, Wang, Han, Ahmad, & Zhang, 2018)                            |
| c.7684A>G                                           | p.(Ser2562Gly)                            |                                 |                     | (R. Li et al., 2017)                                                  |
| c.7782_7783delGA <sup>‡</sup><br>c.9742_9745delAAAC | p.(Lys2595Serfs*6)<br>p.(Lys3248Serfs*13) | Japanese/non-consanguineous     | PM/H/CH             | (Ahmed et al., 2019; Okamoto, Kohmoto, Naruto, Masuda, & Imoto, 2018) |
| <b>c.8718_8721delTTTA</b>                           | <b>p.(Leu2907Argfs*30)</b>                | <b>Pakistani/first cousin</b>   | <b>PM/H</b>         | <b>This Study (Family 26)</b>                                         |

|                                                                           |                                                                                 |                                     |              |                               |
|---------------------------------------------------------------------------|---------------------------------------------------------------------------------|-------------------------------------|--------------|-------------------------------|
| <b>c.9601C&gt;T</b>                                                       | <b>p.(Gln3201*)</b>                                                             | <b>Pakistani/first cousin</b>       | <b>PM/H</b>  | <b>This Study (Family 22)</b> |
| <b>c.9961C&gt;T</b>                                                       | <b>p.(Gln3321*)</b>                                                             | <b>Pakistani/first cousin</b>       | <b>PM/H</b>  | <b>This Study (Family 16)</b> |
| <b>c.6854_6855delTC</b><br><b>c.9976_9977dupGT</b><br><b>c.3741G&gt;A</b> | <b>p.(Leu2285Glnfs*32)</b><br><b>p.(Ser3327Tyrfs*14)</b><br><b>p.(Lys1247=)</b> | <b>Pakistani/non-consanguineous</b> | <b>PM/CH</b> | <b>This Study (Family 32)</b> |
| c.10013delA                                                               | p.(Asp3338Valfs*2)                                                              | Pakistani/first cousin              | PM/H         | (M. A. Khan et al., 2017)     |

**Note:** **PM** stands for primary microcephaly, **H** for homozygous and **CH** for compound heterozygous. Mutation report of this study is mentioned in bold. <sup>†</sup>This mutation was reported in the form of compound heterozygous form along with a known mutation, c.9697C > T, p.(Arg3233\*). <sup>‡</sup>Recently this mutation was found in a Pakistani family with homozygous state.

**TABLE S5** List of disease causing DNA variants reported in *WDR62*

| <b>cDNA mutation</b> | <b>Protein mutation</b>      | <b>Origin</b>                                  | <b>Disorder/zygosity</b> | <b>Reference</b>                            |
|----------------------|------------------------------|------------------------------------------------|--------------------------|---------------------------------------------|
| c.28G>T<br>c.189G>T  | p.(Ala10Ser)<br>p.(Glu63Asp) | Chinese/consanguineous                         | PM/CH                    | (Banerjee et al., 2016)                     |
| c.193G>A             | p.(Val65Met)                 | Pakistani/consanguineous<br>Saudi/first cousin | PM/H                     | (Nicholas et al., 2010;<br>Yu et al., 2010) |
| c.332G>C             | p.(Arg111Thr)                | Pakistani/first cousin                         | PM/H                     | (Sajid Hussain et al., 2013)                |
| c.363delT            | p.(Asp112Metfs*5)            | Mexican/first cousin                           | PM/H                     | (Yu et al., 2010)                           |
| c.390G>A             | p.(Glu130Glu)                | Sudanese/consanguineous                        | PM/H                     | (Bastaki et al., 2016)                      |
| c.535_536insA        | p. (Met179fs*21)             | India/consanguineous                           | PM/H                     | (Bhat et al., 2011)                         |

|                                     |                                      |                                                        |                                                |                                                      |
|-------------------------------------|--------------------------------------|--------------------------------------------------------|------------------------------------------------|------------------------------------------------------|
| c.900C>A                            | p.(Cys300*)                          |                                                        |                                                |                                                      |
| c.668T>C                            | p.(Phe223Ser)                        | Romani/consanguineous<br>Romani/non-<br>consanguineous | PM with abnormal<br>cortical<br>architecture/H | (Zombor et al., 2019)                                |
| c.671G>C                            | p.(Trp224Ser)                        | Turkish/first cousin                                   | PM/H                                           | (Bilguvar et al., 2010)                              |
| c.731C>T<br>c.2413G>T               | p. (Ser244Leu)<br>p.(Glu805*)        | Japanese/non-<br>consanguineous                        | PM/CH                                          | (Miyamoto et al.,<br>2017)                           |
| c.797C>T<br>c.1102G>A               | p.(Ala266Val)<br>p.(Asp368Asn)       | Saudi/consanguineous                                   | PM/CH                                          | (Naseer et al., 2019)                                |
| c.1027C>T                           | p.(Gln343*)                          | Moroccan/consanguineous                                | PM/H                                           | (Jaouad et al., 2018)                                |
| c.883-4_890del<br>c.1684C>G         | p.His562Asp                          | South Korean/ non-<br>consanguineous                   | PM/CH                                          | (Yi et al., 2019)                                    |
| c.883-1273_<br>1237-850del          | Microdeletion of exon<br>8 and 9     | Pakistani/consanguineous                               | PM/H                                           | (Wang, Khan, Han, &<br>Zhang, 2017)                  |
| c.1043+1G>A                         | p.Ser348Argfs*63                     | Turkish/first cousin                                   | PM/H                                           | (Yu et al., 2010)                                    |
| c.1143delA                          | p.(His381Profs*48)                   | Pakistani/consanguineous                               | PM/H                                           | (Memon et al., 2013)                                 |
| c.1194G>A                           | p.(Trp398*)                          | Pakistani/first cousin                                 | PM/H                                           | (Sajid Hussain et al.,<br>2013)                      |
| c.1198G>A                           | p.(Glu400Lys)                        | Hispanic/consanguineous                                | PM/H                                           | (Bacino, Arriola,<br>Wiszniewska, &<br>Bonnen, 2012) |
| c.1313G>A                           | p.(Arg438His)                        | Pakistani/consanguineous                               | PM/H                                           | (Kousar et al., 2011;<br>Nicholas et al., 2010)      |
| c.1313G>A<br>c.2864_2867delACA<br>G | p.(Arg438His)<br>p.(Asp955Alafs*112) | German /non-<br>consanguineous                         | PM/CH                                          | (Frag et al., 2013)                                  |
| c.1408C>T                           | p.(Gln470*)                          | Turkish/first cousin                                   | PM/H                                           | (Bilguvar et al., 2010)                              |
| c.1531G>A                           | p.(Asp511Asn)                        | Pakistani/consanguineous                               | PM/H                                           | (Kousar et al., 2011;                                |

|                                                                                                  |                                         |                                      |                           |                                                        |
|--------------------------------------------------------------------------------------------------|-----------------------------------------|--------------------------------------|---------------------------|--------------------------------------------------------|
|                                                                                                  |                                         |                                      |                           | Nicholas et al., 2010)                                 |
| c.1576G >T<br>c.1576G >A                                                                         | p.(Glu526*)<br>p.(Glu526Lys)            | Turkish/first cousin                 | PM/H                      | (Bilguvar et al., 2010)                                |
| c.1605dupT <sup>†</sup><br>Duplication of 17q25-<br>qter,<br><i>TBCD</i> ;c.3361T>G <sup>†</sup> | p.(Glu536*)<br><br>p.Phe1121Val         | Turkish/consanguineous               | PM/H                      | (Poulton et al., 2014)                                 |
| c.1821dupT                                                                                       | p.(Arg608Serfs*26)                      | French Canadian/first<br>cousin      | PM/H                      | (McDonell et al.,<br>2014)                             |
| c.1942C>T                                                                                        | p.(Gln648*)                             | Pakistani/first cousin               | PM/H                      | (Kousar et al., 2011)                                  |
| c.1973_1974del                                                                                   | p.Val658Glu fs*14                       | Swedish/ consanguineous              | PM/H                      | (Kvarnung et al.,<br>2018)                             |
| c.2115C>G                                                                                        | p.(Gly705Gly)                           | Iranian/consanguineous               | PM, cerebral<br>atrophy/H | (Najmabadi et al.,<br>2011)                            |
| <b>c.2195C&gt;T</b>                                                                              | <b>p.(Thr732Ile)</b>                    | <b>Pakistani/<br/>consanguineous</b> | <b>PM/H</b>               | <b>This study (Family<br/>4)</b>                       |
| c.2083delA<br>c.2472_2473delAG                                                                   | p.(Ser696Alafs*4)<br>p.(Gln918Glyfs*18) | Unknown/non-<br>consanguineous       | Polymicrogyria /CH        | (Murdock et al., 2011)                                 |
| c.2520+5G>T                                                                                      | p.(Asp823Alafs*5)                       | Pakistani/consanguineous             | PM/H                      | (Wang et al., 2017)                                    |
| c.2527dupG                                                                                       | p.(Asp843Glyfs*3)                       | Pakistani/first cousin               | PM/H                      | (Rupp, Rauf, Naveed,<br>Windpassinger, &<br>Mir, 2014) |
| c.2588G>A                                                                                        | p.(Arg863His)                           | Tunisian/consanguineous              | PM/H                      | (Poulton et al., 2014)                                 |
| c.2667_2668GA>TT                                                                                 | p.(Met889Ile)<br>p.(Lys890*)            | Pakistani/consanguineous             | PM/H                      | (Wang et al., 2017)                                    |
| c.2863delGACA                                                                                    | p.(Asp955Alafs*112)                     | Turkish/second cousin                | PM/H                      | (Poulton et al., 2014;<br>Sgourdou et al.,<br>2017)    |
| c.2867+4_<br>2867+7delGGTG                                                                       | p.(Ser956Cysfs*38)                      | Turkish/first cousin                 | PM/H                      | (Yu et al., 2010)                                      |

|                                 |                     |                                                             |                                                     |                                                                          |
|---------------------------------|---------------------|-------------------------------------------------------------|-----------------------------------------------------|--------------------------------------------------------------------------|
| c.3012_3034dup                  | p.(Pro1012fs)       | Unknown                                                     | PM (with or without cortical malformations)/unknown | National Center for Biotechnology Information. ClinVar; [VCV000437292.1] |
| c.3232G>A                       | p.(Ala1078Thr)      | Pakistani/consanguineous                                    | PM/H                                                | (Nicholas et al., 2010)                                                  |
| c.3335+1G>C                     |                     | Italian /non-consanguineous                                 | PM/H                                                | (Nardello et al., 2018)                                                  |
| c.3361delG                      | p.(Ala1121Glnfs*6)  | Pakistani/first cousin                                      | PM/H                                                | (Sajid Hussain et al., 2013)                                             |
| c.3406C>T                       | p.(Arg1136*)        | Unknown                                                     | ID and global developmental delay/H                 | (McSherry et al., 2018)                                                  |
| c.3503G>A                       | p.(Trp1168*)        | Pakistani/second cousin                                     | PM/H                                                | (Sajid Hussain et al., 2013)                                             |
| c.3839_3855delGCCAAGAGCCTGCCCTG | p.(Gly1280Alafs*21) | Turkish/first cousin                                        | PM/H                                                | (Bilguvar et al., 2010; Yu et al., 2010)                                 |
| c.3878C>A                       | p.(Ala1293Asp)      | Saudi/consanguineous                                        | PM/H                                                | (Naseer et al., 2017)                                                    |
| c.3936dupC <sup>‡</sup>         | p.(Val1314Argfs*18) | Pakistani/consanguineous<br>Turkish/first cousin<br>Unknown | PM/H                                                | (Kousar et al., 2011; Nicholas et al., 2010; Yu et al., 2010)            |
| c.4205_4208delTGCC              | p.(Val1402Glyfs*12) | Turkish/first cousin                                        | PM/H                                                | (Bilguvar et al., 2010)                                                  |
| c.4241dupT                      | p.(Leu1414Leufs*41) | Pakistani/unknown                                           | PM/H                                                | (Nicholas et al., 2010)                                                  |

**Note:** **PM** stands for primary microcephaly, **H** for homozygous and **CH** for compound heterozygous. <sup>†</sup>This mutation is the corrected form of c.1605\_1606insT which is modified according to the HGVS (Human Genome Variation Society) guidelines. <sup>‡</sup>Renamed (c.3935\_3936insT) according to the HGVS recommendations. <sup>¶</sup>Indicates modifiers where duplication of chromosomal segment 17q25-qter on one allele and a missense mutation, c.3361T>G;p.(Phe1121Val), of *TBCD* on the other, non-duplicated allele was found.

**TABLE S6** List of disease causing DNA variants identified in *CDK5RAP2*

| <b>cDNA mutation</b>                                                              | <b>Protein mutation</b>               | <b>Origin</b>                             | <b>Disorder/Zygoty</b> | <b>Reference</b>                                  |
|-----------------------------------------------------------------------------------|---------------------------------------|-------------------------------------------|------------------------|---------------------------------------------------|
| c.246T>A                                                                          | p.(Tyr82*)                            | Pakistani/first cousin                    | PM/H                   | (Bond et al., 2005; Hassan et al., 2007)          |
| c.4005-15A>G                                                                      |                                       | Northern Pakistan/first cousins           | PM/H                   | (Bond et al., 2005)                               |
| <b>c.448C&gt;T</b>                                                                | <b>p.(Arg150*)</b>                    | <b>Pakistani /consanguineous</b>          | <b>PM/H</b>            | <b>This study (Family 3)</b>                      |
| c.700G>T                                                                          | p.(Glu234*)                           | Somali/second cousin                      | PM/H                   | (Pagnamenta et al., 2012)                         |
| c.4441C>T                                                                         | p.(Arg1481*)                          | Italian/third cousins                     | PM/H                   | (Issa et al., 2013)                               |
| c.4546G>T<br>c.4672C>T                                                            | p.(Glu1516*)<br>p.(Arg1558*)          |                                           | PM/ CH                 | (Boonsawat et al., 2019; Pagnamenta et al., 2012) |
| c.524_528del<br>c.4005-1G>A                                                       |                                       | Caucasian/non-consanguinity               | PM/ CH                 | (Issa et al., 2013; Tan et al., 2014)             |
| c.4441C>T<br>c.5227C>T                                                            | p.(Arg1481*)<br>p.(Gln1743*)          | Guatemalan and Honduran/non-consanguinity | PM/ CH                 | (M. H. Li et al., 2015)                           |
| c. 4005-9A>G                                                                      | p.(Arg1335Serfs*3)                    | Turkish /second cousin                    | SS/H                   | (Yigit et al., 2015)                              |
| c.383+1G>C,                                                                       | p.(Lys129*)                           | Pakistani /unknown                        |                        |                                                   |
| c.4187T>C,<br>Digenic with mutation of<br><i>CEP152</i> ;c.3014_3015delAAin<br>sT | p.(Met1396Thr)<br>p.(Lys1005Ilefs*16) | German /non-consanguineous                | SS/CH                  |                                                   |
| c.4604+1G>C<br>c.3097delG                                                         | p.(Val1033fs*41)                      | British<br>Caucasian/unknown              | PM/ CH                 | (Pagnamenta et al., 2016)                         |
| c.1279C>T                                                                         | p.(Arg427*)                           | Pakistani/first cousin                    | PM/H                   | (Ahmad et al., 2017)                              |
| c.4114C >T                                                                        | p.(Arg1372*)                          | Pakistani/first cousins                   | PM/H                   | (Sukumaran et al., 2017)                          |
| c.280G>A<br>c.3695A>G                                                             | p.(Gly94Arg)<br>p.(Asn1232Ser)        | French Canadian<br>/non-consanguineous    | ACC/CH                 | (Jouan et al., 2016)                              |

|                                                        |                                         |                          |                     |                                                     |
|--------------------------------------------------------|-----------------------------------------|--------------------------|---------------------|-----------------------------------------------------|
| c.5127_5128dupGT                                       | p.(Ser1710Cysfs*22)                     | Pakistani/consanguineous |                     | (Abdullah et al., 2017)                             |
| c.4055A>G                                              | p.(Glu1352Gly)                          | Saudi/consanguineous     | PM/H                | (Alfares et al., 2018)                              |
| c.4672C>T                                              | p.(Arg1558*)                            | Saudi/consanguineous     | PM/H                | (Alfares et al., 2018)                              |
| c.558_559delGA<br>c.4441C>T                            | p.(Glu186Aspfs*32)<br>p.(Arg1481*)      |                          | PM /CH              | (Boonsawat et al., 2019;<br>Issa et al., 2013)      |
| c.3928G>T<br>c.4546G>T                                 | p.(Glu1310*)<br>p.(Glu1516*)            | Unknown                  | PM+short stature/CH | (Boonsawat et al., 2019;<br>Lancaster et al., 2013) |
| c.140delT,<br>c.384_2106del                            | p.(Val47Glyfs*14)<br>p.(Lys129Phefs*22) | Saudi/non-consanguineous | PM/CH               | (Shaheen et al., 2019)                              |
| c.4005-15A>G,<br>Digenic with <i>CNTRL</i><br>c.586C>T | p.(Arg196*)                             | Saudi/second cousin      | PD/ CH              | (Shaheen et al., 2019)                              |

**Note:** **PM** stands for primary microcephaly, **PD** for primordial dwarfism, **ACC** for agenesis of the corpus callosum, **SS** for Seckel syndrome, **H** for homozygous and **CH** for compound heterozygous. Mutation in bold is the finding of this study.

**TABLE S7** List of disease causing variants identified in *CENPJ*

| cDNA mutation      | Protein mutation       | Origin                          | Disorder/Zygosity | Reference                                                                      |
|--------------------|------------------------|---------------------------------|-------------------|--------------------------------------------------------------------------------|
| <b>c.18delC</b>    | <b>p.(Ser7Profs*2)</b> | <b>Pakistani/consanguineous</b> | <b>PM/H</b>       | <b>(Bond et al., 2005; Sajid Hussain et al., 2013), This study (Family 11)</b> |
| c.3704A>T          | p.(GLu1235Val)         | Brazilian/first cousin          | PM/H              | (Bond et al., 2005)                                                            |
| c.3242_3246delTCAG | p.(Ser1081Argfs*8)     | Pakistani/first cousin          | PM/H              | (Gul et al., 2006)                                                             |
| c.2462C>T          | p.(Thr821Met)          | Iranian/unknown                 | PM/H              | (Darvish et al., 2010)                                                         |
| c.3302-1G>C        |                        |                                 | SS/H              | (Al-Dosari, Shaheen, Colak, & Alkuraya, 2010)                                  |



|                                                             |                                                               |                                                                         |      |                        |
|-------------------------------------------------------------|---------------------------------------------------------------|-------------------------------------------------------------------------|------|------------------------|
| *[(3302_3366del),<br>(3217_3366del),<br>(3217_3477del)]     | p.(1102_1122delfs*6),<br>p.(1073_1122de),<br>p.(1073_1159del) | Saudi/first cousin                                                      |      |                        |
| c.3302-1G>C,<br>c.43_44del,<br>c.133C>T,<br>c.125_126delAA, | p.(Asn15Leufs*42),<br>p.(Arg45*),<br>p.(Lys42Argfs*15)        | Saudi/non<br>consanguineous<br>Saudi/first Cousin<br>Saudi/first Cousin | PM/H | (Shaheen et al., 2019) |

**Note:** **PM** stands for primary microcephaly, **SS** for Seckel syndrome, **H** for homozygous and **CH** for compound heterozygous. <sup>†</sup>Three different transcripts produced due to the splice variant, c.3302-1G>C. Mutation in bold is the finding of this study.

**TABLE S8** List of disease causing DNA variants identified in *STIL*

| cDNA mutation                 | Protein mutation                                                | Origin                               | Disorder/Zygoty           | Reference                     |
|-------------------------------|-----------------------------------------------------------------|--------------------------------------|---------------------------|-------------------------------|
| c.453+5G>A                    | p.(Asp89Glyfs*8)                                                | Pakistani/first cousin               | PM/H                      | (Kakar et al., 2015)          |
| c.3715C>T                     | p.(Gln1240*)                                                    | Indian/consanguineous                | PM+ developmental delay/H | (Kumar et al., 2009)          |
| c.3655delG                    | P.(Leu1219*)                                                    |                                      |                           |                               |
| c.2829+1G>A                   | p.(Gly944Valfs*15)                                              |                                      |                           |                               |
| c.2392T>G                     | p.(Leu798Trp*)                                                  | Iranian/<br>consanguineous           | PM/H                      | (Papari et al., 2013)         |
| c.2354_2355dupGA<br>c.3835C>T | p.(Lys786Glufs*5)<br>(paternal)<br>p.(Arg1280Cys)<br>(maternal) | Unknown/Non-<br>consanguineous       | PM/CH                     | (Bennett et al., 2014)        |
| <b>c.3694C&gt;T</b>           | <b>p.(Arg1232*)</b>                                             | <b>Pakistani/<br/>consanguineous</b> | <b>PM/H</b>               | <b>This study (Family 24)</b> |
| <b>c.3759dupT</b>             | <b>p.(Pro1254Serfs*2)</b>                                       | <b>Pakistani/<br/>consanguineous</b> | <b>PM/H</b>               | <b>This study (Family 29)</b> |

|                        |                                 |                                   |                              |                                                                               |
|------------------------|---------------------------------|-----------------------------------|------------------------------|-------------------------------------------------------------------------------|
| c.2150G>A              | p.(Gly717Glu)                   | Turkish/ first cousin             | Holoprosencephaly+ PM/H      | (Mouden et al., 2015)                                                         |
| c.1231C>G<br>c.3370A>G | p.(His411Asp)<br>p.(Met1124Val) | Caucasian /non-<br>consanguineous | Severe fetal microcephaly/CH | (Cristofoli, De<br>Keersmaecker, De<br>Catte, Vermeesch, &<br>Van Esch, 2017) |
| c.3552_3553del         | p.(Cys1184*)                    | Saudi/consanguineous              | PM/H                         | (Shaheen et al., 2019)                                                        |

**Note:** **PM** stands for primary microcephaly, **H** for homozygous and **CH** for compound heterozygous. In bold are findings reported in this study.

**TABLE S9** List of disease causing DNA variants identified in *CEP135*

| cDNA mutation       | Protein mutation    | Origin                          | Disorder    | Reference                     |
|---------------------|---------------------|---------------------------------|-------------|-------------------------------|
| c.970delC           | p.(Gln324Serfs*)    | Pakistani/first cousin          | PM/H        | (Hussain et al., 2012)        |
| c.1473+1G>A         | p.(Glu417Glyfs*2)   | Pakistani/first cousin          | PM/H        | (Farooq et al., 2016)         |
| c.2722C>T           | p.(Arg908*)         | Saudi/first cousin              | PD/H        | (Shaheen et al., 2019)        |
| <b>c.3157G&gt;T</b> | <b>p.(Glu1053*)</b> | <b>Pakistani/consanguineous</b> | <b>PM/H</b> | <b>This study (Family 23)</b> |

**Note:** **PM** stands for primary microcephaly, **PD** for primordial dwarfism, **H** for homozygous and **CH** for compound heterozygous. Mutation report of this study is mentioned in bold.

## REFERENCES

Abdullah, U., Farooq, M., Mang, Y., Marriam Bakhtiar, S., Fatima, A., Hansen, L., . . . Mahmood Baig, S. (2017). A novel mutation in CDK5RAP2 gene causes primary microcephaly with speech impairment and sparse eyebrows in a consanguineous Pakistani family. *Eur J Med Genet*, 60(12), 627-630. doi:10.1016/j.ejmg.2017.07.017

- Ahmad, I., Baig, S. M., Abdulkareem, A. R., Hussain, M. S., Sur, I., Toliat, M. R., . . . Nurnberg, P. (2017). Genetic heterogeneity in Pakistani microcephaly families revisited. *Clin Genet*, *92*(1), 62-68. doi:10.1111/cge.12955
- Ahmed, J., Windpassinger, C., Salim, M., Wiener, M., Petek, E., Schaflinger, E., . . . Khan, M. A. (2019). Genetic study of Khyber-Pukhtunkhwa resident Pakistani families presenting primary microcephaly with intellectual disability. *J Pak Med Assoc*, *69*(12), 1812-1816. doi:10.5455/JPMA.300681
- Al-Dosari, M. S., Shaheen, R., Colak, D., & Alkuraya, F. S. (2010). Novel CENPJ mutation causes Seckel syndrome. *J Med Genet*, *47*(6), 411-414. doi:10.1136/jmg.2009.076646
- Alfares, A., Alhufayti, I., Alsubaie, L., Alowain, M., Almass, R., Alfadhel, M., . . . Eyaid, W. (2018). A new association between CDK5RAP2 microcephaly and congenital cataracts. *Ann Hum Genet*, *82*(3), 165-170. doi:10.1111/ahg.12232
- Awad, S., Al-Dosari, M. S., Al-Yacoub, N., Colak, D., Salih, M. A., Alkuraya, F. S., & Poizat, C. (2013). Mutation in PHC1 implicates chromatin remodeling in primary microcephaly pathogenesis. *Hum Mol Genet*, *22*(11), 2200-2213. doi:10.1093/hmg/ddt072
- Bacino, C. A., Arriola, L. A., Wiszniewska, J., & Bonnen, P. E. (2012). WDR62 missense mutation in a consanguineous family with primary microcephaly. *Am J Med Genet A*, *158A*(3), 622-625. doi:10.1002/ajmg.a.34417
- Banerjee, S., Chen, H., Huang, H., Wu, J., Yang, Z., Deng, W., . . . Li, X. (2016). Novel mutations c.28G>T (p.Ala10Ser) and c.189G>T (p.Glu63Asp) in WDR62 associated with early onset acanthosis and hyperkeratosis in a patient with autosomal recessive microcephaly type 2. *Oncotarget*, *7*(48), 78363-78371. doi:10.18632/oncotarget.13279
- Basit, S., Al-Harbi, K. M., Alhijji, S. A., Albalawi, A. M., Alharby, E., Eldardear, A., & Samman, M. I. (2016). CIT, a gene involved in neurogenic cytokinesis, is mutated in human primary microcephaly. *Hum Genet*, *135*(10), 1199-1207. doi:10.1007/s00439-016-1724-0
- Bastaki, F., Mohamed, M., Nair, P., Saif, F., Tawfiq, N., Aithala, G., . . . Hamzeh, A. R. (2016). Novel splice-site mutation in WDR62 revealed by whole-exome sequencing in a Sudanese family with primary microcephaly. *Congenit Anom (Kyoto)*, *56*(3), 135-137. doi:10.1111/cga.12144
- Bazgir, A., Agha Gholizadeh, M., Sarvar, F., & Pakzad, Z. (2019). A Novel Frameshift Mutation in Abnormal Spindle-Like Microcephaly (ASPM) Gene in an Iranian Patient with Primary Microcephaly: A Case Report. *Iran J Public Health*, *48*(11), 2074-2078. Retrieved from <http://www.ncbi.nlm.nih.gov/pubmed/31970108>
- Bennett, H., Presti, A., Adams, D., Rios, J., Benito, C., & Cohen, D. (2014). A prenatal presentation of severe microcephaly and brain anomalies in a patient with novel compound heterozygous mutations in the STIL gene found postnatally with exome analysis. *Pediatr Neurol*, *51*(3), 434-436. doi:10.1016/j.pediatrneurol.2014.05.023
- Bhargav, D. S., Sreedevi, N., Swapna, N., Vivek, S., & Kovvali, S. (2017). Whole exome sequencing identifies a novel homozygous frameshift mutation in the ASPM gene, which causes microcephaly 5, primary, autosomal recessive. *F1000Res*, *6*, 2163. doi:10.12688/f1000research.12102.1
- Bhat, V., Girimaji, S. C., Mohan, G., Arvinda, H. R., Singhmar, P., Duvvari, M. R., & Kumar, A. (2011). Mutations in WDR62, encoding a centrosomal and nuclear protein, in Indian primary microcephaly families with cortical malformations. *Clin Genet*, *80*(6), 532-540. doi:10.1111/j.1399-0004.2011.01686.x
- Bilguvar, K., Ozturk, A. K., Louvi, A., Kwan, K. Y., Choi, M., Tatli, B., . . . Gunel, M. (2010). Whole-exome sequencing identifies recessive WDR62 mutations in severe brain malformations. *Nature*, *467*(7312), 207-210. doi:10.1038/nature09327

- Bond, J., Roberts, E., Springell, K., Lizarraga, S. B., Scott, S., Higgins, J., . . . Woods, C. G. (2005). A centrosomal mechanism involving CDK5RAP2 and CENPJ controls brain size. *Nat Genet*, *37*(4), 353-355. doi:10.1038/ng1539
- Boonsawat, P., Joset, P., Steindl, K., Oneda, B., Gogoll, L., Azzarello-Burri, S., . . . Rauch, A. (2019). Elucidation of the phenotypic spectrum and genetic landscape in primary and secondary microcephaly. *Genet Med*, *21*(9), 2043-2058. doi:10.1038/s41436-019-0464-7
- Braun, D. A., Lovric, S., Schapiro, D., Schneider, R., Marquez, J., Asif, M., . . . Hildebrandt, F. (2018). Mutations in multiple components of the nuclear pore complex cause nephrotic syndrome. *J Clin Invest*, *128*(10), 4313-4328. doi:10.1172/JCI98688
- Cristofoli, F., De Keersmaecker, B., De Catte, L., Vermeesch, J. R., & Van Esch, H. (2017). Novel STIL Compound Heterozygous Mutations Cause Severe Fetal Microcephaly and Centriolar Lengthening. *Mol Syndromol*, *8*(6), 282-293. doi:10.1159/000479666
- Darvish, H., Esmaeli-Nieh, S., Monajemi, G. B., Mohseni, M., Ghasemi-Firouzabadi, S., Abedini, S. S., . . . Najmabadi, H. (2010). A clinical and molecular genetic study of 112 Iranian families with primary microcephaly. *J Med Genet*, *47*(12), 823-828. doi:10.1136/jmg.2009.076398
- DiStasio, A., Driver, A., Sund, K., Donlin, M., Muraleedharan, R. M., Pooya, S., . . . Stottmann, R. W. (2017). Copb2 is essential for embryogenesis and hypomorphic mutations cause human microcephaly. *Hum Mol Genet*, *26*(24), 4836-4848. doi:10.1093/hmg/ddx362
- Farag, H. G., Froehler, S., Oexle, K., Ravindran, E., Schindler, D., Staab, T., . . . Kaindl, A. M. (2013). Abnormal centrosome and spindle morphology in a patient with autosomal recessive primary microcephaly type 2 due to compound heterozygous WDR62 gene mutation. *Orphanet J Rare Dis*, *8*, 178. doi:10.1186/1750-1172-8-178
- Farooq, M., Fatima, A., Mang, Y., Hansen, L., Kjaer, K. W., Baig, S. M., . . . Tommerup, N. (2016). A novel splice site mutation in CEP135 is associated with primary microcephaly in a Pakistani family. *J Hum Genet*, *61*(3), 271-273. doi:10.1038/jhg.2015.138
- Genin, A., Desir, J., Lambert, N., Biervliet, M., Van Der Aa, N., Pierquin, G., . . . Abramowicz, M. (2012). Kinetochores KMN network gene CASC5 mutated in primary microcephaly. *Hum Mol Genet*, *21*(24), 5306-5317. doi:10.1093/hmg/ddc386
- Guemez-Gamboa, A., Nguyen, L. N., Yang, H., Zaki, M. S., Kara, M., Ben-Omran, T., . . . Gleeson, J. G. (2015). Inactivating mutations in MFSD2A, required for omega-3 fatty acid transport in brain, cause a lethal microcephaly syndrome. *Nat Genet*, *47*(7), 809-813. doi:10.1038/ng.3311
- Guernsey, D. L., Jiang, H., Hussin, J., Arnold, M., Bouyakdan, K., Perry, S., . . . Samuels, M. E. (2010). Mutations in centrosomal protein CEP152 in primary microcephaly families linked to MCPH4. *Am J Hum Genet*, *87*(1), 40-51. doi:10.1016/j.ajhg.2010.06.003
- Gul, A., Hassan, M. J., Hussain, S., Raza, S. I., Chishti, M. S., & Ahmad, W. (2006). A novel deletion mutation in CENPJ gene in a Pakistani family with autosomal recessive primary microcephaly. *J Hum Genet*, *51*(9), 760-764. doi:10.1007/s10038-006-0017-1
- Hassan, M. J., Khurshid, M., Azeem, Z., John, P., Ali, G., Chishti, M. S., & Ahmad, W. (2007). Previously described sequence variant in CDK5RAP2 gene in a Pakistani family with autosomal recessive primary microcephaly. *Bmc Medical Genetics*, *8*, 58. doi:10.1186/1471-2350-8-58
- Hussain, M. S., Baig, S. M., Neumann, S., Nurnberg, G., Farooq, M., Ahmad, I., . . . Nurnberg, P. (2012). A truncating mutation of CEP135 causes primary microcephaly and disturbed centrosomal function. *Am J Hum Genet*, *90*(5), 871-878. doi:10.1016/j.ajhg.2012.03.016
- Hussain, M. S., Baig, S. M., Neumann, S., Peche, V. S., Szczepanski, S., Nurnberg, G., . . . Noegel, A. A. (2013). CDK6 associates with the centrosome during mitosis and is mutated in a large Pakistani family with primary microcephaly. *Hum Mol Genet*, *22*(25), 5199-5214. doi:10.1093/hmg/ddt374

- Issa, L., Kraemer, N., Rickert, C. H., Sifringer, M., Ninnemann, O., Stoltenburg-Didinger, G., & Kaindl, A. M. (2013). CDK5RAP2 expression during murine and human brain development correlates with pathology in primary autosomal recessive microcephaly. *Cereb Cortex*, *23*(9), 2245-2260. doi:10.1093/cercor/bhs212
- Jackson, A. P., Eastwood, H., Bell, S. M., Adu, J., Toomes, C., Carr, I. M., . . . Woods, C. G. (2002). Identification of microcephalin, a protein implicated in determining the size of the human brain. *Am J Hum Genet*, *71*(1), 136-142. doi:10.1086/341283
- Jaouad, I. C., Zrhidri, A., Jdioui, W., Lyahyai, J., Raymond, L., Egea, G., . . . Sefiani, A. (2018). A novel non sense mutation in WDR62 causes autosomal recessive primary microcephaly: a case report. *Bmc Medical Genetics*, *19*. doi:Artn 11810.1186/S12881-018-0625-6
- Jeffers, L. J., Coull, B. J., Stack, S. J., & Morrison, C. G. (2008). Distinct BRCT domains in Mcph1/Brit1 mediate ionizing radiation-induced focus formation and centrosomal localization. *Oncogene*, *27*(1), 139-144. doi:10.1038/sj.onc.1210595
- Jouan, L., Ouled Amar Bencheikh, B., Daoud, H., Dionne-Laporte, A., Dobrzaniecka, S., Spiegelman, D., . . . Rouleau, G. A. (2016). Exome sequencing identifies recessive CDK5RAP2 variants in patients with isolated agenesis of corpus callosum. *Eur J Hum Genet*, *24*(4), 607-610. doi:10.1038/ejhg.2015.156
- Kadir, R., Harel, T., Markus, B., Perez, Y., Bakhrat, A., Cohen, I., . . . Birk, O. S. (2016). ALFY-Controlled DVL3 Autophagy Regulates Wnt Signaling, Determining Human Brain Size. *PLoS Genet*, *12*(3), e1005919. doi:10.1371/journal.pgen.1005919
- Kakar, N., Ahmad, J., Morris-Rosendahl, D. J., Altmuller, J., Friedrich, K., Barbi, G., . . . Borck, G. (2015). STIL mutation causes autosomal recessive microcephalic lobar holoprosencephaly. *Hum Genet*, *134*(1), 45-51. doi:10.1007/s00439-014-1487-4
- Khan, A., Wang, R., Han, S., Ahmad, W., & Zhang, X. (2018). Identification of a Novel Nonsense ASPM Mutation in a Large Consanguineous Pakistani Family Using Targeted Next-Generation Sequencing. *Genet Test Mol Biomarkers*, *22*(3), 159-164. doi:10.1089/gtmb.2017.0229
- Khan, M. A., Windpassinger, C., Ali, M. Z., Zubair, M., Gul, H., Abbas, S., . . . Nawaz, Z. (2017). Molecular genetic analysis of consanguineous families with primary microcephaly identified pathogenic variants in the ASPM gene. *J Genet*, *96*(2), 383-387. Retrieved from <http://www.ncbi.nlm.nih.gov/pubmed/28674240>
- Kousar, R., Hassan, M. J., Khan, B., Basit, S., Mahmood, S., Mir, A., . . . Ansar, M. (2011). Mutations in WDR62 gene in Pakistani families with autosomal recessive primary microcephaly. *BMC Neurol*, *11*, 119. doi:10.1186/1471-2377-11-119
- Kumar, A., Girimaji, S. C., Duvvari, M. R., & Blanton, S. H. (2009). Mutations in STIL, encoding a pericentriolar and centrosomal protein, cause primary microcephaly. *Am J Hum Genet*, *84*(2), 286-290. doi:10.1016/j.ajhg.2009.01.017
- Kvarnung, M., Taylan, F., Nilsson, D., Anderlid, B. M., Malmgren, H., Lagerstedt-Robinson, K., . . . Lundberg, E. S. (2018). Genomic screening in rare disorders: New mutations and phenotypes, highlighting ALG14 as a novel cause of severe intellectual disability. *Clin Genet*, *94*(6), 528-537. doi:10.1111/cge.13448
- Lancaster, M. A., Renner, M., Martin, C. A., Wenzel, D., Bicknell, L. S., Hurles, M. E., . . . Knoblich, J. A. (2013). Cerebral organoids model human brain development and microcephaly. *Nature*, *501*(7467), 373-+. doi:Doi 10.1038/Nature12517
- Li, M. H., Arndt, K., Das, S., Weiss, E. M., Wu, Y., Gwal, K., . . . Zackai, E. H. (2015). Compound heterozygote CDK5RAP2 mutations in a Guatemalan/Honduran child with autosomal recessive primary microcephaly, failure to thrive and speech delay. *American Journal of Medical Genetics Part A*, *167*(6), 1414-1417.
- Li, R., Sun, L., Fang, A., Li, P., Wu, Q., & Wang, X. (2017). Recapitulating cortical development with organoid culture in vitro and modeling abnormal spindle-like (ASPM related primary) microcephaly disease. *Protein Cell*, *8*(11), 823-833. doi:10.1007/s13238-017-0479-2

- Marakhonov, A. V., Konovalov, F. A., Makaov, A. K., Vasilyeva, T. A., Kadyshev, V. V., Galkina, V. A., . . . Zinchenko, R. A. (2018). Primary microcephaly case from the Karachay-Cherkess Republic poses an additional support for microcephaly and Seckel syndrome spectrum disorders. *BMC Med Genomics*, *11*(Suppl 1), 8. doi:10.1186/s12920-018-0326-1
- Martin, C. A., Murray, J. E., Carroll, P., Leitch, A., Mackenzie, K. J., Halachev, M., . . . Jackson, A. P. (2016). Mutations in genes encoding condensin complex proteins cause microcephaly through decatenation failure at mitosis. *Genes Dev*, *30*(19), 2158-2172. doi:10.1101/gad.286351.116
- McDonnell, L. M., Warman Chardon, J., Schwartzenruber, J., Foster, D., Beaulieu, C. L., Consortium, F. C., . . . Boycott, K. M. (2014). The utility of exome sequencing for genetic diagnosis in a familial microcephaly epilepsy syndrome. *BMC Neurol*, *14*, 22. doi:10.1186/1471-2377-14-22
- McSherry, M., Masih, K. E., Elcioglu, N. H., Celik, P., Balci, O., Cengiz, F. B., . . . Tekin, M. (2018). Identification of candidate gene FAM183A and novel pathogenic variants in known genes: High genetic heterogeneity for autosomal recessive intellectual disability. *PLoS One*, *13*(11), e0208324. doi:10.1371/journal.pone.0208324
- Memon, M. M., Raza, S. I., Basit, S., Kousar, R., Ahmad, W., & Ansar, M. (2013). A novel WDR62 mutation causes primary microcephaly in a Pakistani family. *Mol Biol Rep*, *40*(1), 591-595. doi:10.1007/s11033-012-2097-7
- Mirzaa, G. M., Vitre, B., Carpenter, G., Abramowicz, I., Gleeson, J. G., Paciorkowski, A. R., . . . O'Driscoll, M. (2014). Mutations in CENPE define a novel kinetochore-centromeric mechanism for microcephalic primordial dwarfism. *Hum Genet*, *133*(8), 1023-1039. doi:10.1007/s00439-014-1443-3
- Miyamoto, T., Akutsu, S. N., Fukumitsu, A., Morino, H., Masatsuna, Y., Hosoba, K., . . . Matsuura, S. (2017). PLK1-mediated phosphorylation of WDR62/MCPH2 ensures proper mitotic spindle orientation. *Hum Mol Genet*, *26*(22), 4429-4440. doi:10.1093/hmg/ddx330
- Moawia, A., Shaheen, R., Rasool, S., Waseem, S. S., Ewida, N., Budde, B., . . . Hussain, M. S. (2017). Mutations of KIF14 cause primary microcephaly by impairing cytokinesis. *Ann Neurol*, *82*(4), 562-577. doi:10.1002/ana.25044
- Moriwaki, T., Yamazaki, N., So, T., Kosuga, M., Miyazaki, O., Narumi-Kishimoto, Y., . . . Fukuhara, Y. (2019). Normal early development in siblings with novel compound heterozygous variants in ASPM. *Hum Genome Var*, *6*, 56. doi:10.1038/s41439-019-0088-0
- Mouden, C., de Tayrac, M., Dubourg, C., Rose, S., Carre, W., Hamdi-Roze, H., . . . David, V. (2015). Homozygous STIL mutation causes holoprosencephaly and microcephaly in two siblings. *PLoS One*, *10*(2), e0117418. doi:10.1371/journal.pone.0117418
- Murdock, D. R., Clark, G. D., Bainbridge, M. N., Newsham, I., Wu, Y. Q., Muzny, D. M., . . . Ramocki, M. B. (2011). Whole-exome sequencing identifies compound heterozygous mutations in WDR62 in siblings with recurrent polymicrogyria. *Am J Med Genet A*, *155A*(9), 2071-2077. doi:10.1002/ajmg.a.34165
- Najmabadi, H., Hu, H., Garshasbi, M., Zemojtel, T., Abedini, S. S., Chen, W., . . . Ropers, H. H. (2011). Deep sequencing reveals 50 novel genes for recessive cognitive disorders. *Nature*, *478*(7367), 57-63. doi:10.1038/nature10423
- Nardello, R., Fontana, A., Antona, V., Beninati, A., Mangano, G. D., Stallone, M. C., & Mangano, S. (2018). A novel mutation of WDR62 gene associated with severe phenotype including infantile spasm, microcephaly, and intellectual disability. *Brain Dev*, *40*(1), 58-64. doi:10.1016/j.braindev.2017.07.003
- Naseer, M. I., Rasool, M., Abdulkareem, A. A., Chaudhary, A. G., Zaidi, S. K., & Al-Qahtani, M. H. (2019). Novel compound heterozygous mutations in WDR62 gene leading to developmental delay and Primary Microcephaly in Saudi Family. *Pak J Med Sci*, *35*(3), 764-770. doi:10.12669/pjms.35.3.36

- Naseer, M. I., Rasool, M., Sogaty, S., Chaudhary, R. A., Mansour, H. M., Chaudhary, A. G., . . . Al-Qahtani, M. H. (2017). A novel WDR62 mutation causes primary microcephaly in a large consanguineous Saudi family. *Ann Saudi Med*, 37(2), 148-153. doi:10.5144/0256-4947.2017.148
- Nicholas, A. K., Khurshid, M., Desir, J., Carvalho, O. P., Cox, J. J., Thornton, G., . . . Woods, C. G. (2010). WDR62 is associated with the spindle pole and is mutated in human microcephaly. *Nature Genetics*, 42(11), 1010-U1138. doi:Doi 10.1038/Ng.682
- Okamoto, N., Kohmoto, T., Naruto, T., Masuda, K., & Imoto, I. (2018). Primary microcephaly caused by novel compound heterozygous mutations in ASPM. *Hum Genome Var*, 5, 18015. doi:10.1038/hgv.2018.15
- Pagnamenta, A. T., Howard, M. F., Knight, S. J., Keays, D. A., Quaghebeur, G., Taylor, J. C., & Kini, U. (2016). Activation of an exonic splice-donor site in exon 30 of CDK5RAP2 in a patient with severe microcephaly and pigmentary abnormalities. *Clin Case Rep*, 4(10), 952-956. doi:10.1002/ccr3.663
- Pagnamenta, A. T., Murray, J. E., Yoon, G., Sadighi Akha, E., Harrison, V., Bicknell, L. S., . . . Knight, S. J. (2012). A novel nonsense CDK5RAP2 mutation in a Somali child with primary microcephaly and sensorineural hearing loss. *Am J Med Genet A*, 158A(10), 2577-2582. doi:10.1002/ajmg.a.35558
- Papari, E., Bastami, M., Farhadi, A., Abedini, S. S., Hosseini, M., Bahman, I., . . . Najmabadi, H. (2013). Investigation of primary microcephaly in Bushehr province of Iran: novel STIL and ASPM mutations. *Clin Genet*, 83(5), 488-490. doi:10.1111/j.1399-0004.2012.01949.x
- Perez, Y., Bar-Yaacov, R., Kadir, R., Wormser, O., Shelef, I., Birk, O. S., . . . Birnbaum, R. Y. (2019). Mutations in the microtubule-associated protein MAP11 (C7orf43) cause microcephaly in humans and zebrafish. *Brain*, 142(3), 574-585. doi:10.1093/brain/awz004
- Poulton, C. J., Schot, R., Seufert, K., Lequin, M. H., Accogli, A., Annunzio, G. D., . . . Mancini, G. M. (2014). Severe presentation of WDR62 mutation: is there a role for modifying genetic factors? *Am J Med Genet A*, 164A(9), 2161-2171. doi:10.1002/ajmg.a.36611
- Rupp, V., Rauf, S., Naveed, I., Windpassinger, C., & Mir, A. (2014). A novel single base pair duplication in WDR62 causes primary microcephaly. *Bmc Medical Genetics*, 15, 107. doi:10.1186/s12881-014-0107-4
- Sajid Hussain, M., Marriam Bakhtiar, S., Farooq, M., Anjum, I., Janzen, E., Reza Toliat, M., . . . Hansen, L. (2013). Genetic heterogeneity in Pakistani microcephaly families. *Clin Genet*, 83(5), 446-451. doi:10.1111/j.1399-0004.2012.01932.x
- Sgourdou, P., Mishra-Gorur, K., Saotome, I., Henagariu, O., Tuysuz, B., Campos, C., . . . Louvi, A. (2017). Disruptions in asymmetric centrosome inheritance and WDR62-Aurora kinase B interactions in primary microcephaly. *Sci Rep*, 7, 43708. doi:10.1038/srep43708
- Shaheen, R., Maddirevula, S., Ewida, N., Alsahli, S., Abdel-Salam, G. M. H., Zaki, M. S., . . . Alkuraya, F. S. (2019). Genomic and phenotypic delineation of congenital microcephaly. *Genet Med*, 21(3), 545-552. doi:10.1038/s41436-018-0140-3
- Shen, J., Eyaid, W., Mochida, G. H., Al-Moayyad, F., Bodell, A., Woods, C. G., & Walsh, C. A. (2005). ASPM mutations identified in patients with primary microcephaly and seizures. *J Med Genet*, 42(9), 725-729. doi:10.1136/jmg.2004.027706
- Sukumaran, S. K., Stumpf, M., Salamon, S., Ahmad, I., Bhattacharya, K., Fischer, S., . . . Noegel, A. A. (2017). CDK5RAP2 interaction with components of the Hippo signaling pathway may play a role in primary microcephaly. *Mol Genet Genomics*, 292(2), 365-383. doi:10.1007/s00438-016-1277-x
- Tan, C. A., Topper, S., Ward Melder, C., Stein, J., Reeder, A., Arndt, K., & Das, S. (2014). The first case of CDK5RAP2-related primary microcephaly in a non-consanguineous patient identified by next generation sequencing. *Brain Dev*, 36(4), 351-355. doi:10.1016/j.braindev.2013.05.001

- Wang, R., Khan, A., Han, S., & Zhang, X. (2017). Molecular analysis of 23 Pakistani families with autosomal recessive primary microcephaly using targeted next-generation sequencing. *J Hum Genet*, *62*(2), 299-304. doi:10.1038/jhg.2016.128
- Yamamoto, S., Jaiswal, M., Charng, W. L., Gambin, T., Karaca, E., Mirzaa, G., . . . Bellen, H. J. (2014). A drosophila genetic resource of mutants to study mechanisms underlying human genetic diseases. *Cell*, *159*(1), 200-214. doi:10.1016/j.cell.2014.09.002
- Yang, Y. J., Baltus, A. E., Mathew, R. S., Murphy, E. A., Evrony, G. D., Gonzalez, D. M., . . . Walsh, C. A. (2012). Microcephaly gene links trithorax and REST/NRSF to control neural stem cell proliferation and differentiation. *Cell*, *151*(5), 1097-1112. doi:10.1016/j.cell.2012.10.043
- Yi, Y. G., Lee, D. W., Kim, J., Jang, J. H., Lee, S. M., & Jang, D. H. (2019). Two Novel Mutations (c.883-4\_890del and c.1684C>G) of WDR62 Gene Associated With Autosomal Recessive Primary Microcephaly: A Case Report. *Front Pediatr*, *7*, 457. doi:10.3389/fped.2019.00457
- Yigit, G., Brown, K. E., Kayserili, H., Pohl, E., Caliebe, A., Zahnleiter, D., . . . Wollnik, B. (2015). Mutations in CDK5RAP2 cause Seckel syndrome. *Mol Genet Genomic Med*, *3*(5), 467-480. doi:10.1002/mgg3.158
- Yu, T. W., Mochida, G. H., Tischfield, D. J., Sgaier, S. K., Flores-Sarnat, L., Sergi, C. M., . . . Walsh, C. A. (2010). Mutations in WDR62, encoding a centrosome-associated protein, cause microcephaly with simplified gyri and abnormal cortical architecture. *Nat Genet*, *42*(11), 1015-1020. doi:10.1038/ng.683
- Zombor, M., Kalmar, T., Nagy, N., Berenyi, M., Telcs, B., Maroti, Z., . . . Sztriha, L. (2019). A novel WDR62 missense mutation in microcephaly with abnormal cortical architecture and review of the literature. *J Appl Genet*, *60*(2), 151-162. doi:10.1007/s13353-019-00486-y
